# Supplementary material
Source: MDPI journal article supplement (https://www.mdpi.com/2304-6740/10/11/207)
Supplement: s1 [file s1]

Article

# How to Protect *ortho*-Carborane from Decapitation. Practical Synthesis of 3,6-Dihalogen Derivatives 3,6-X<sub>2</sub>- 1,2-C<sub>2</sub>B<sub>10</sub>H<sub>10</sub> (X = Cl, Br, I)

Akim V. Shmal'ko <sup>1</sup>, Sergey A. Anufriev <sup>1</sup>, Kyrill Yu. Suponitsky <sup>1,2</sup> and Igor B. Sivaev <sup>1,2\*</sup>

<sup>1</sup> A. N. Nesmeyanov Institute of Organoelement Compounds, Russian Academy of Sciences, 28 Vavilov Str., Moscow, 119334, Russia; akimbend@yandex.ru (A.V.S.); trueMan476@mail.ru (S.A.A.); kirshik@yahoo.com (K.Y.S.); sivaev@ineos.ac.ru (I.B.S.)

<sup>2</sup> Basic Department of Chemistry of Innovative Materials and Technologies, G.V. Plekhanov Russian University of Economics, 36 Stremyanniy Line, 117997 Moscow, Russia

\* Correspondence: sivaev@ineos.ac.ru; Tel.: +7-916-5902025

|                                                                                                             |    |
|-------------------------------------------------------------------------------------------------------------|----|
| 1. NMR spectra of 3-Bpin-1,2-C <sub>2</sub> B <sub>10</sub> H <sub>11</sub> ( <b>1</b> )                    | 2  |
| 2. NMR spectra of 3,6-(Bpin) <sub>2</sub> -1,2-C <sub>2</sub> B <sub>10</sub> H <sub>10</sub> ( <b>2</b> )  | 3  |
| 3. NMR spectra of 3-Cl-1,2-C <sub>2</sub> B <sub>10</sub> H <sub>11</sub> ( <b>3</b> )                      | 5  |
| 4. NMR spectra of 3-Br-1,2-C <sub>2</sub> B <sub>10</sub> H <sub>11</sub> ( <b>4</b> )                      | 6  |
| 5. NMR spectra of 3-I-1,2-C <sub>2</sub> B <sub>10</sub> H <sub>11</sub> ( <b>5</b> )                       | 8  |
| 6. NMR spectra of 3-AcO-1,2-C <sub>2</sub> B <sub>10</sub> H <sub>11</sub> ( <b>6</b> )                     | 9  |
| 7. NMR spectra of 3,6-Cl <sub>2</sub> -1,2-C <sub>2</sub> B <sub>10</sub> H <sub>10</sub> ( <b>7</b> )      | 11 |
| 8. MS spectrum of 3,6-Cl <sub>2</sub> -1,2-C <sub>2</sub> B <sub>10</sub> H <sub>10</sub> ( <b>7</b> )      | 16 |
| 9. NMR spectra of 3,6-Br <sub>2</sub> -1,2-C <sub>2</sub> B <sub>10</sub> H <sub>10</sub> ( <b>8</b> )      | 16 |
| 10. NMR spectra of 3,6-I <sub>2</sub> -1,2-C <sub>2</sub> B <sub>10</sub> H <sub>10</sub> ( <b>9</b> )      | 19 |
| 11. NMR spectra of 3,6-(AcO) <sub>2</sub> -1,2-C <sub>2</sub> B <sub>10</sub> H <sub>10</sub> ( <b>10</b> ) | 21 |
| 12. NMR spectra of Cs[3-Cl-7,8-C <sub>2</sub> B <sub>9</sub> H <sub>11</sub> ] ( <b>11</b> )                | 22 |
| 13. MS spectrum of Cs[3-Cl-7,8-C <sub>2</sub> B <sub>9</sub> H <sub>11</sub> ] ( <b>11</b> )                | 25 |

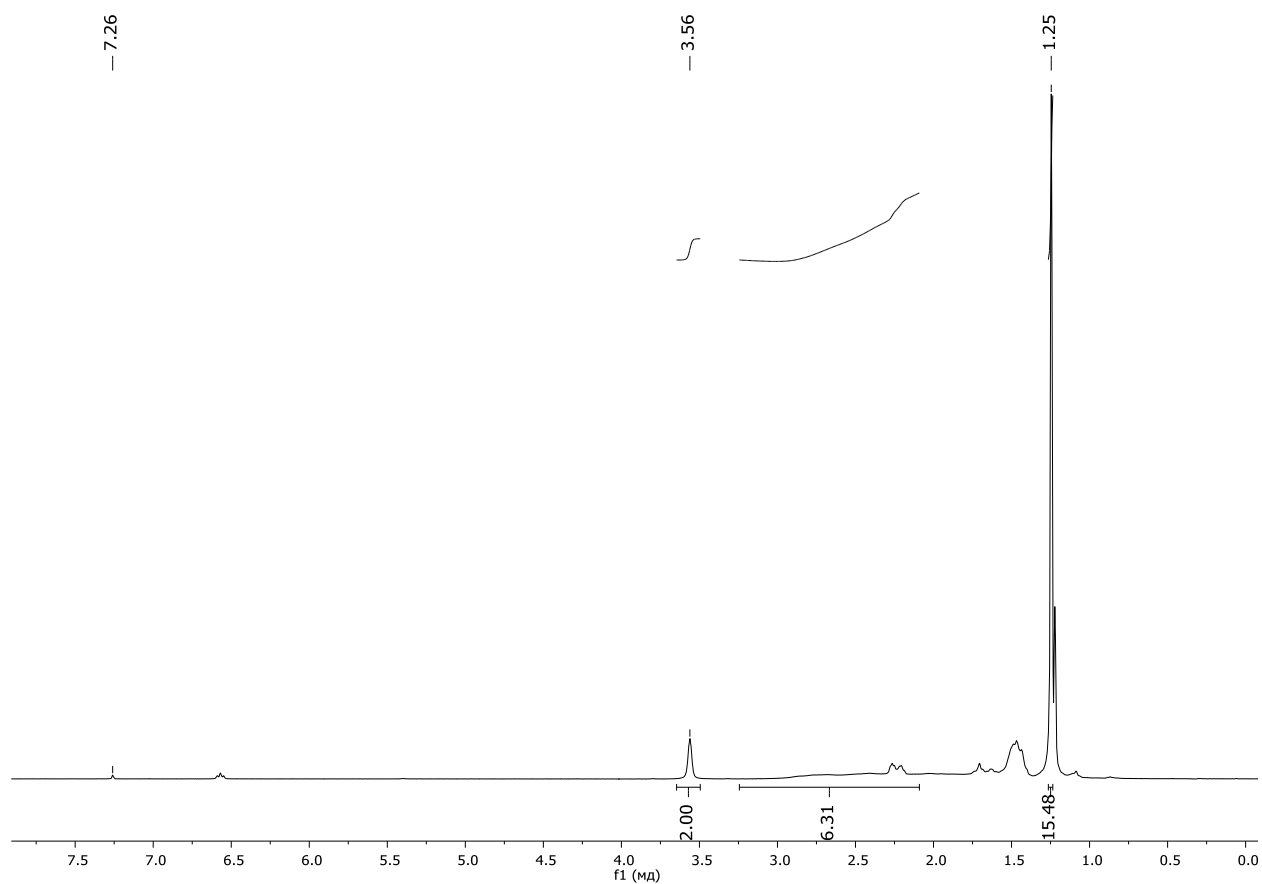

**Figure S1.** <sup>1</sup>H NMR spectrum of 3-Bpin-*ortho*-C<sub>2</sub>B<sub>10</sub>H<sub>11</sub> (**1**) in CDCl<sub>3</sub>.

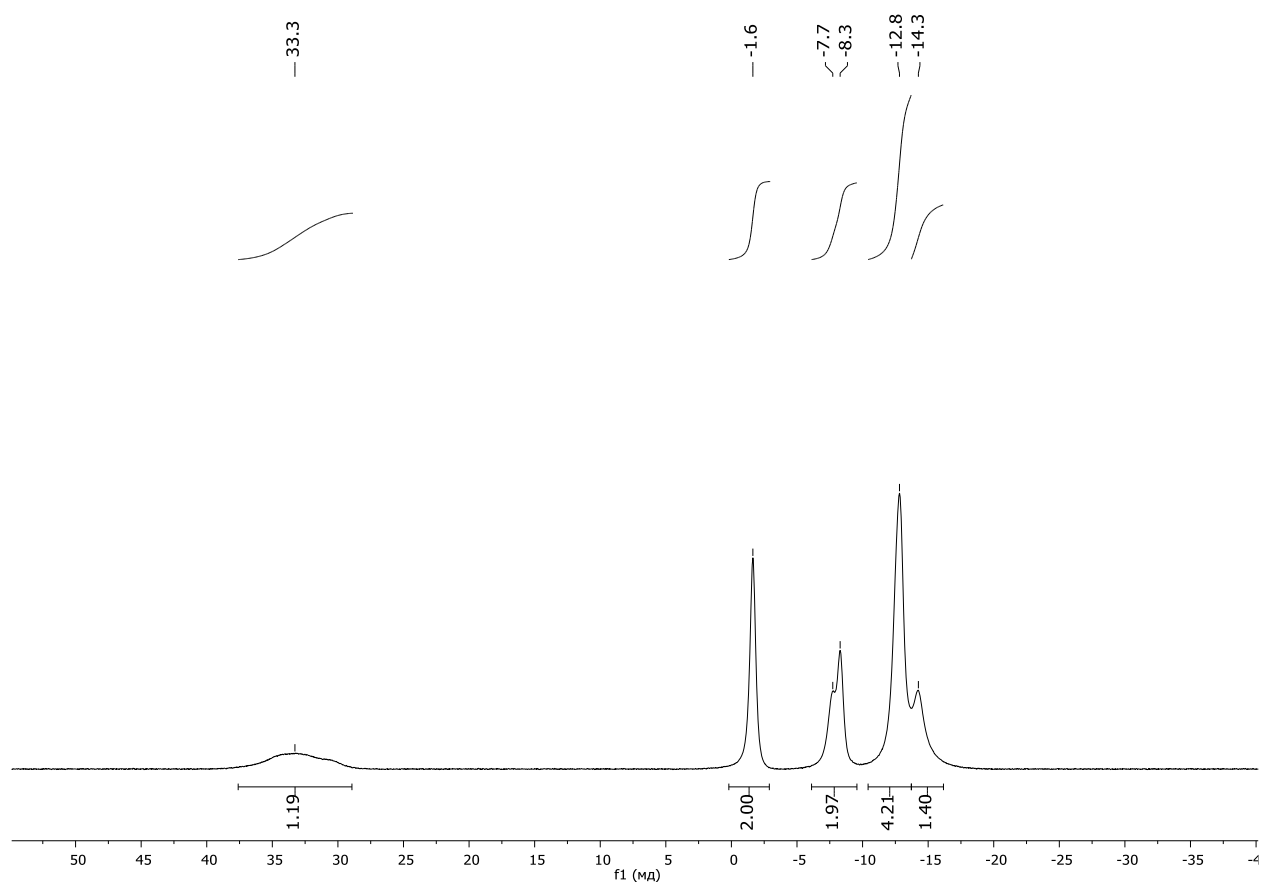

**Figure S2.** <sup>11</sup>B{<sup>1</sup>H} NMR spectrum of 3-Bpin-1,2-C<sub>2</sub>B<sub>10</sub>H<sub>11</sub> (**1**) in CDCl<sub>3</sub>.

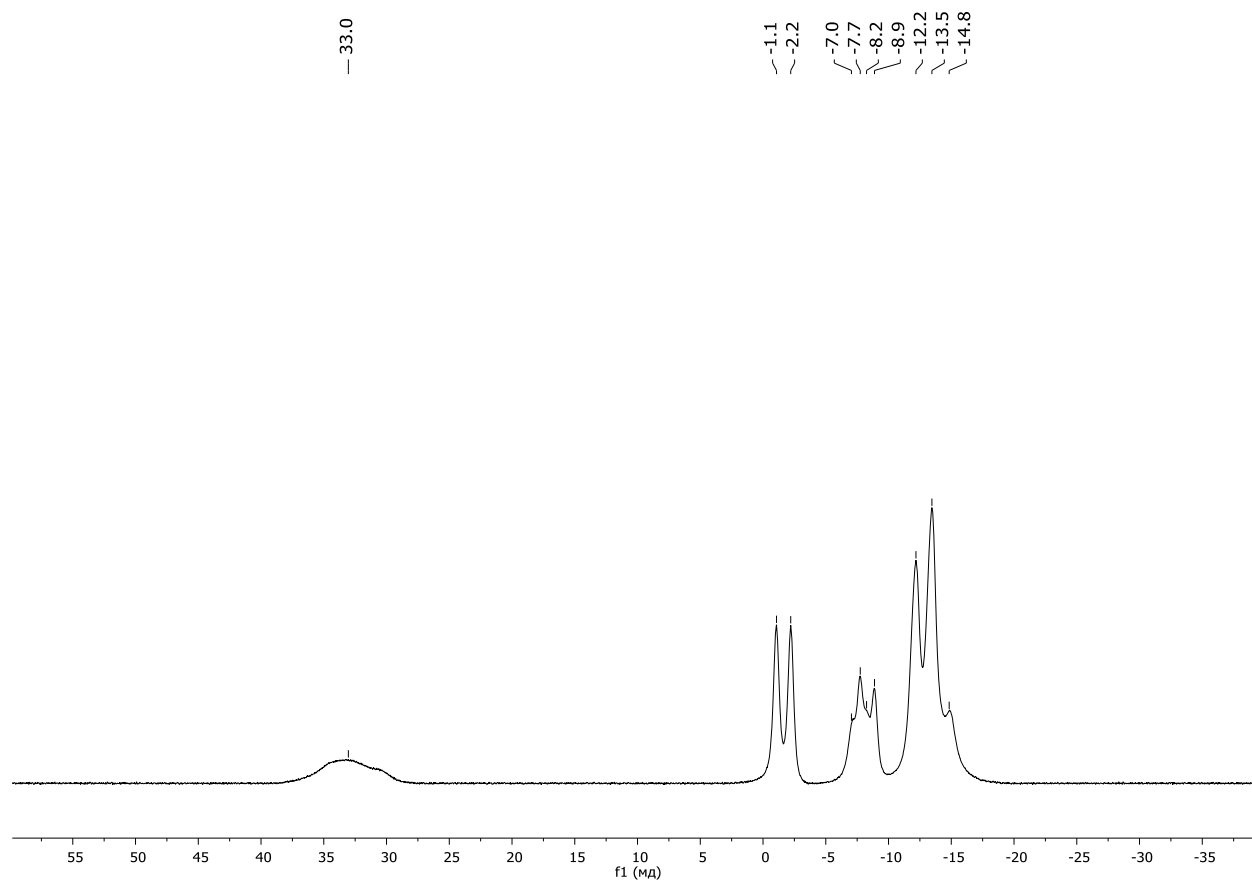

**Figure S3.**  $^{11}\text{B}$  NMR spectrum of 3-Bpin-1,2- $\text{C}_2\text{B}_{10}\text{H}_{11}$  (**1**) in  $\text{CDCl}_3$ .

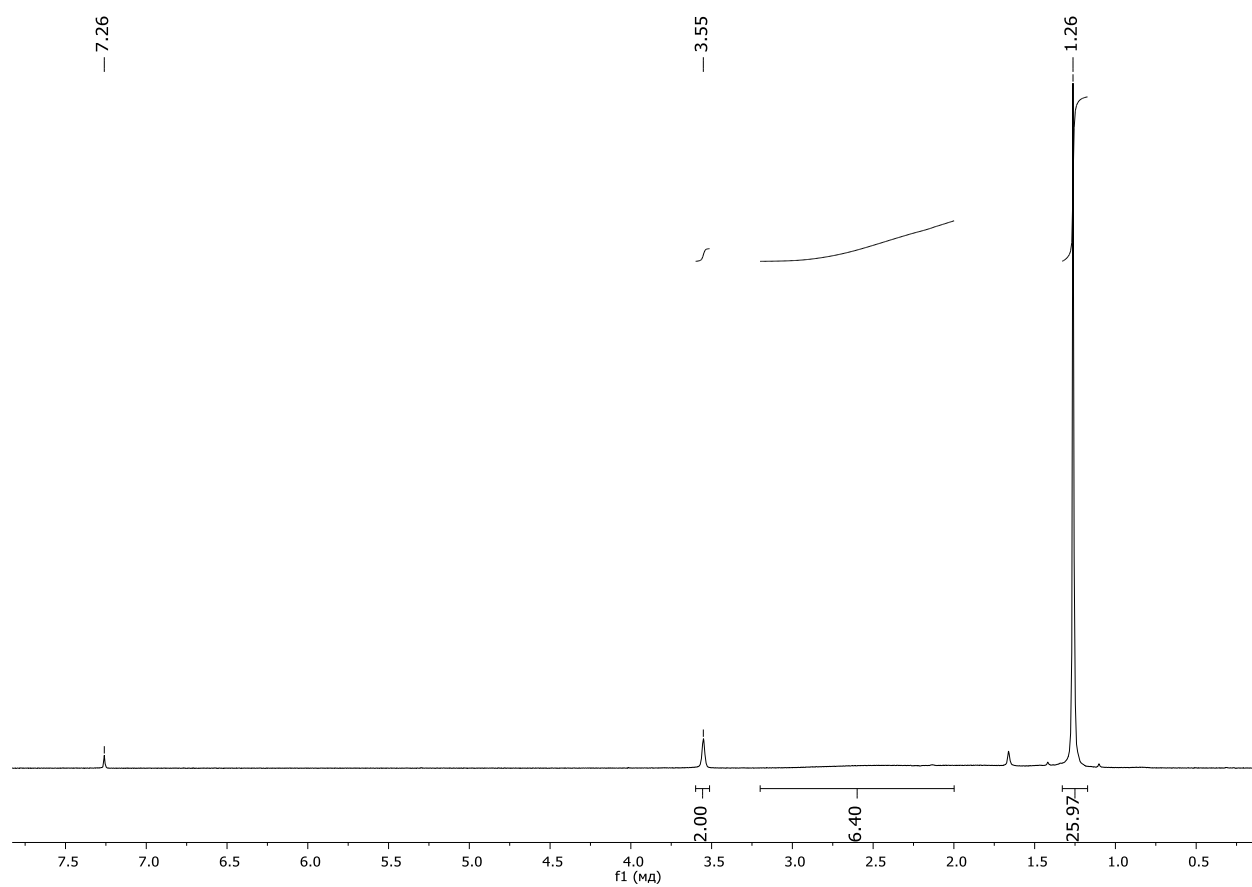

**Figure S4.**  $^1\text{H}$  NMR spectrum of 3,6-(Bpin) $_2$ -1,2- $\text{C}_2\text{B}_{10}\text{H}_{10}$  (**2**) in  $\text{CDCl}_3$ .

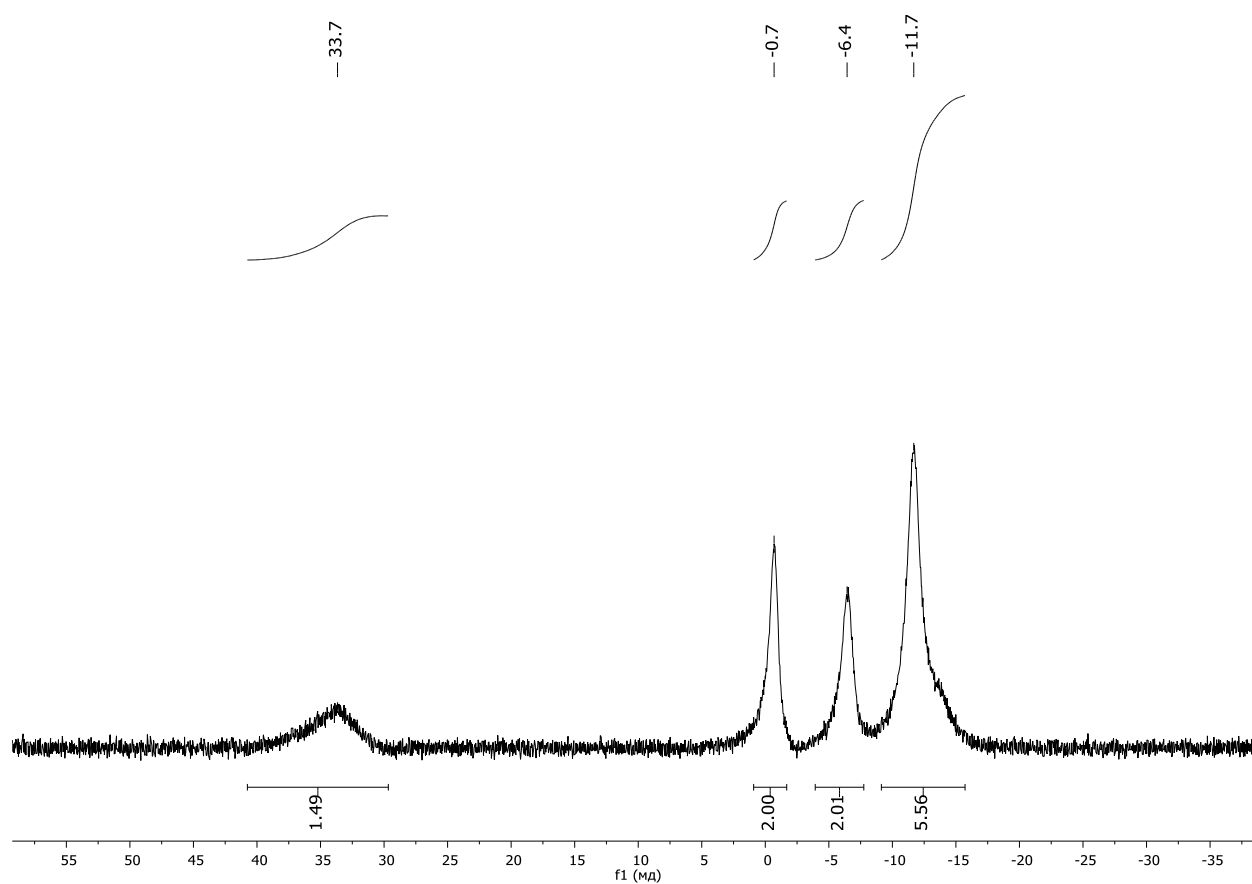

**Figure S5.**  $^{11}\text{B}\{^1\text{H}\}$  NMR spectrum of 3,6-(Bpin) $_2$ -1,2- $\text{C}_2\text{B}_{10}\text{H}_{10}$  (**2**) in  $\text{CDCl}_3$ .

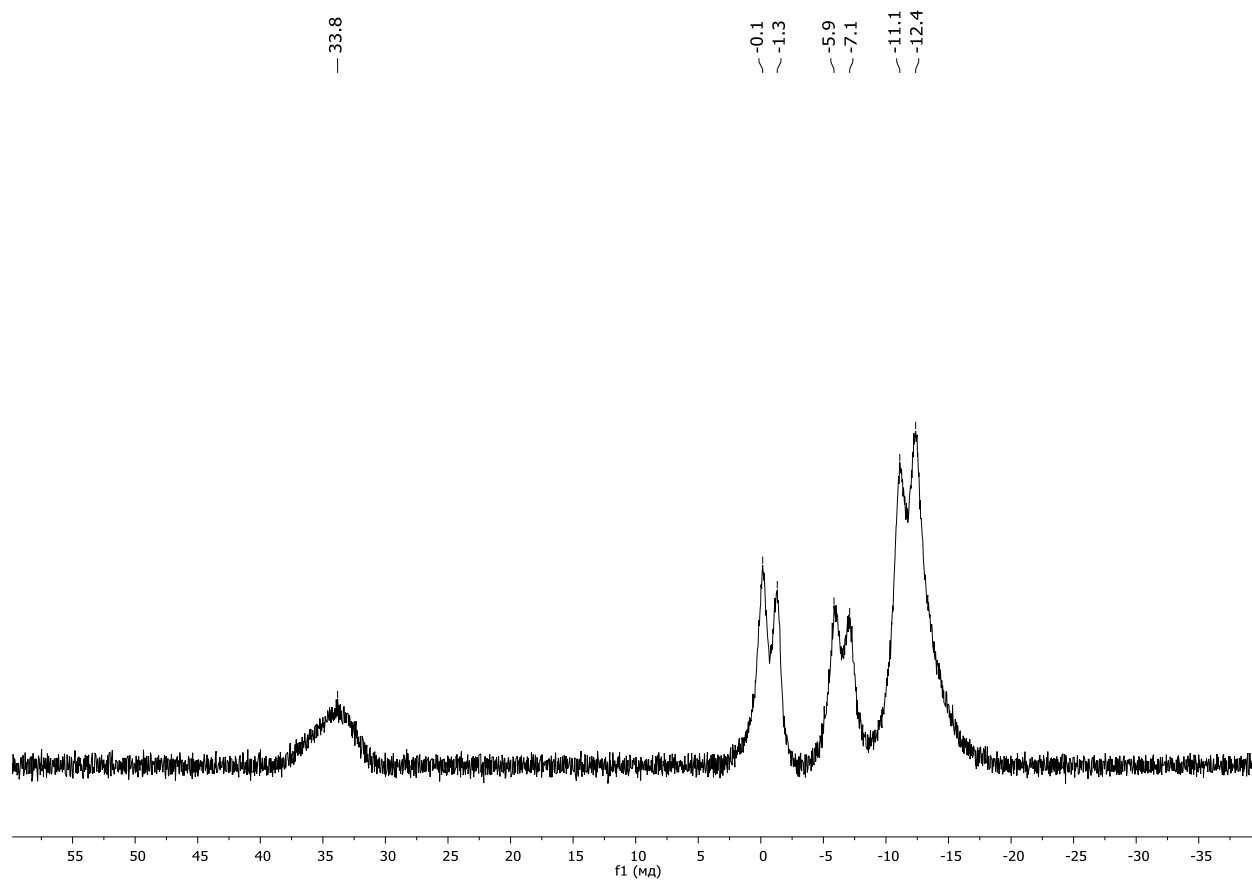

**Figure S6.**  $^{11}\text{B}$  NMR spectrum of 3,6-(Bpin) $_2$ -1,2- $\text{C}_2\text{B}_{10}\text{H}_{10}$  (**2**) in  $\text{CDCl}_3$ .

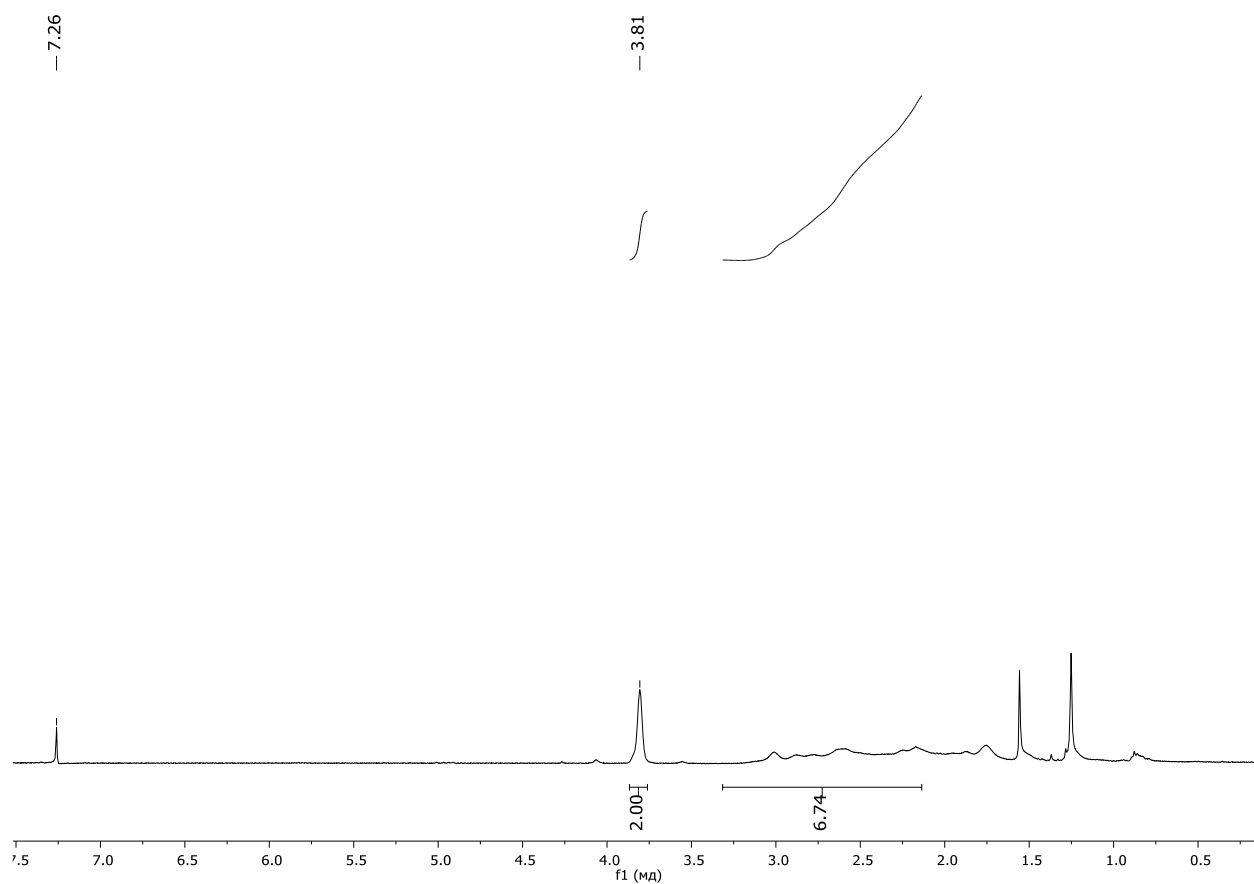

**Figure S7.**  $^1\text{H}$  NMR spectrum of 3-Cl-1,2- $\text{C}_2\text{B}_{10}\text{H}_{11}$  (**3**) in  $\text{CDCl}_3$ .

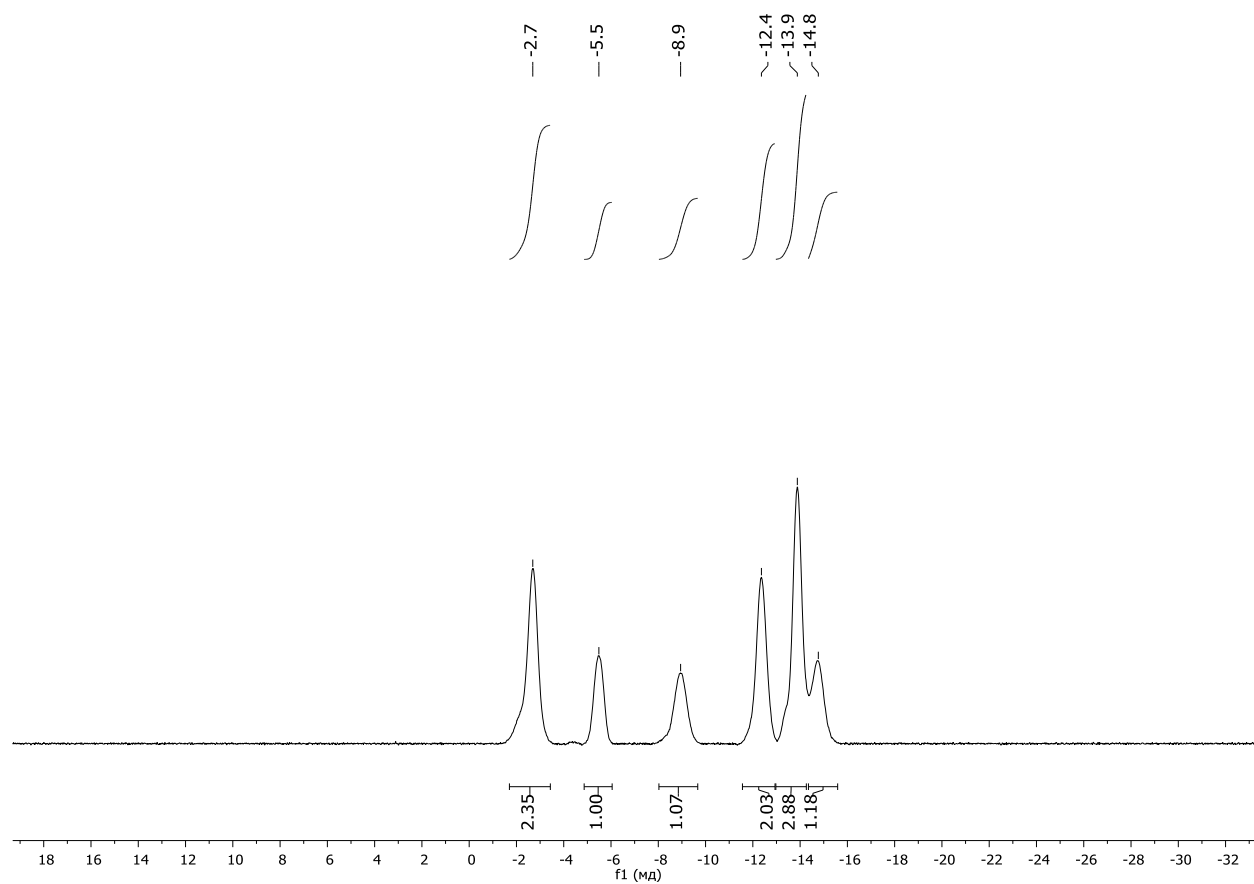

**Figure S8.**  $^{11}\text{B}\{^1\text{H}\}$  NMR spectrum of 3-Cl-1,2- $\text{C}_2\text{B}_{10}\text{H}_{11}$  (**3**) in  $\text{CDCl}_3$ .

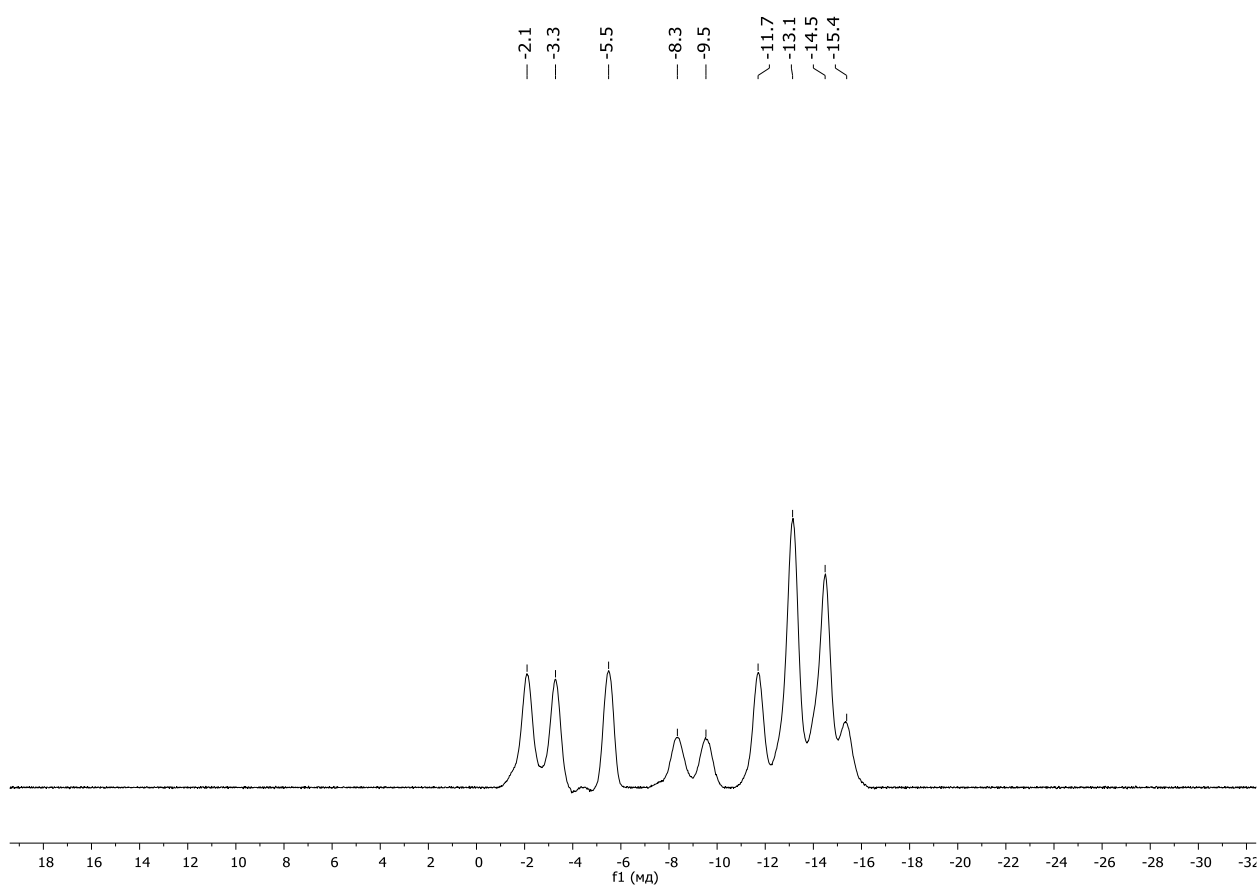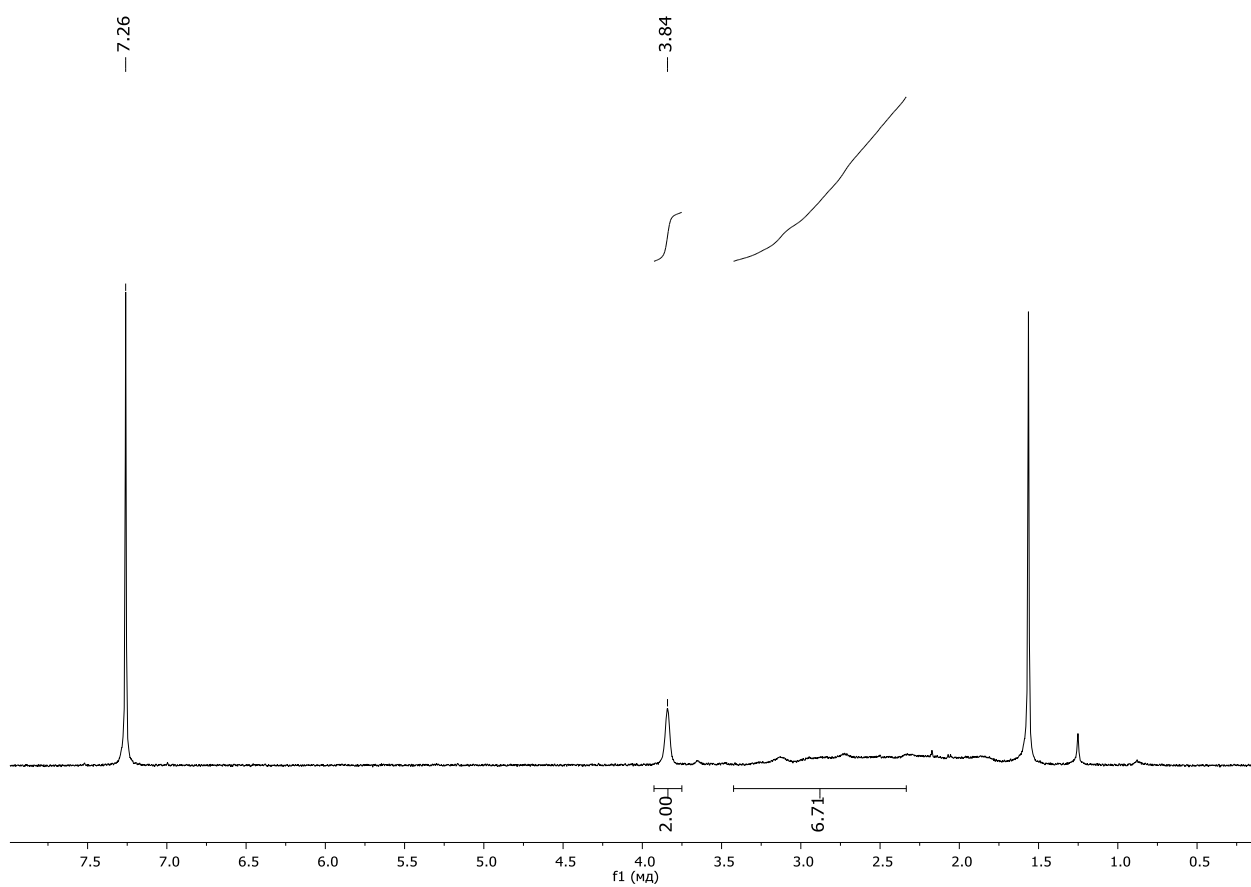

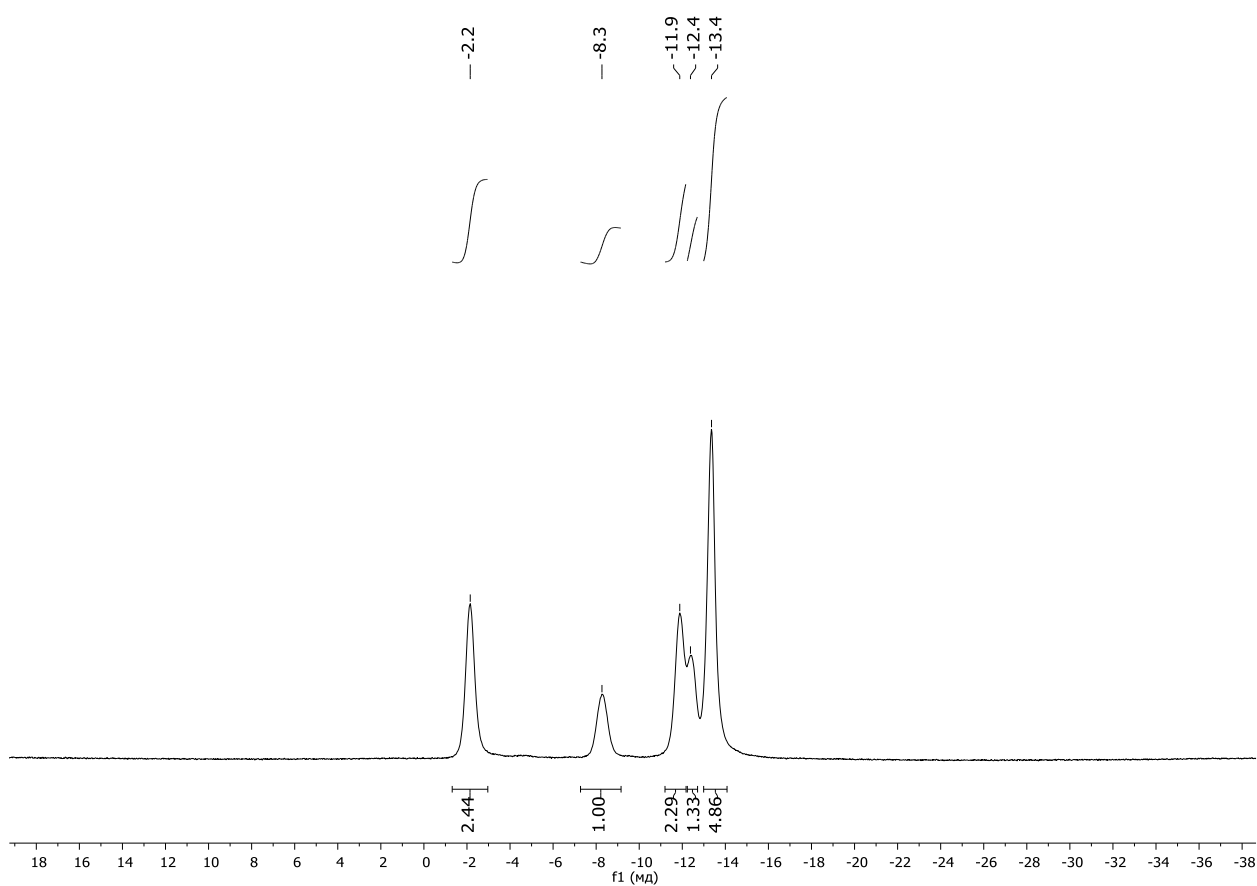

**Figure S11.**  $^{11}\text{B}\{^1\text{H}\}$  NMR spectrum of 3-Br-1,2- $\text{C}_2\text{B}_{10}\text{H}_{11}$  (**4**) in  $\text{CDCl}_3$ .

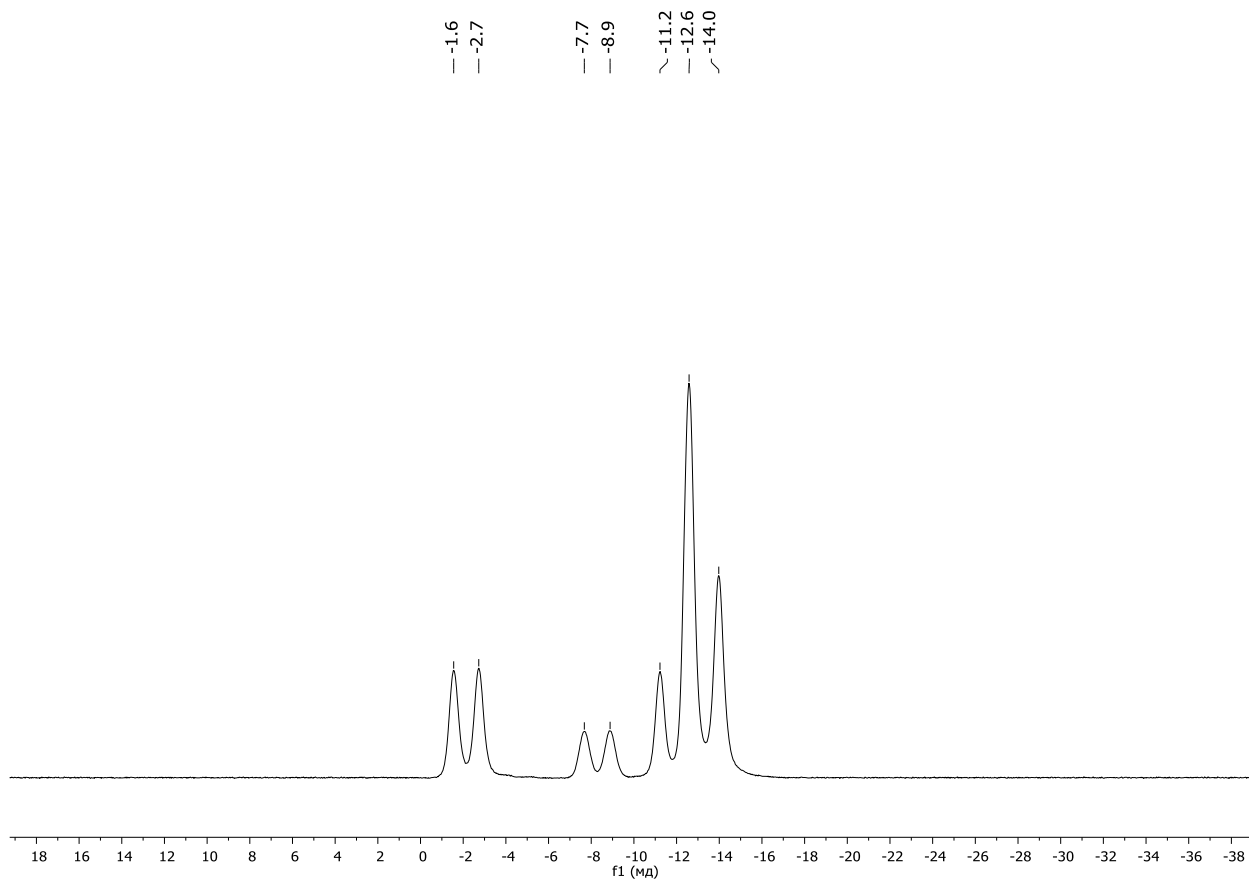

**Figure S12.**  $^{11}\text{B}$  NMR spectrum of 3-Br-1,2- $\text{C}_2\text{B}_{10}\text{H}_{11}$  (**4**) in  $\text{CDCl}_3$ .

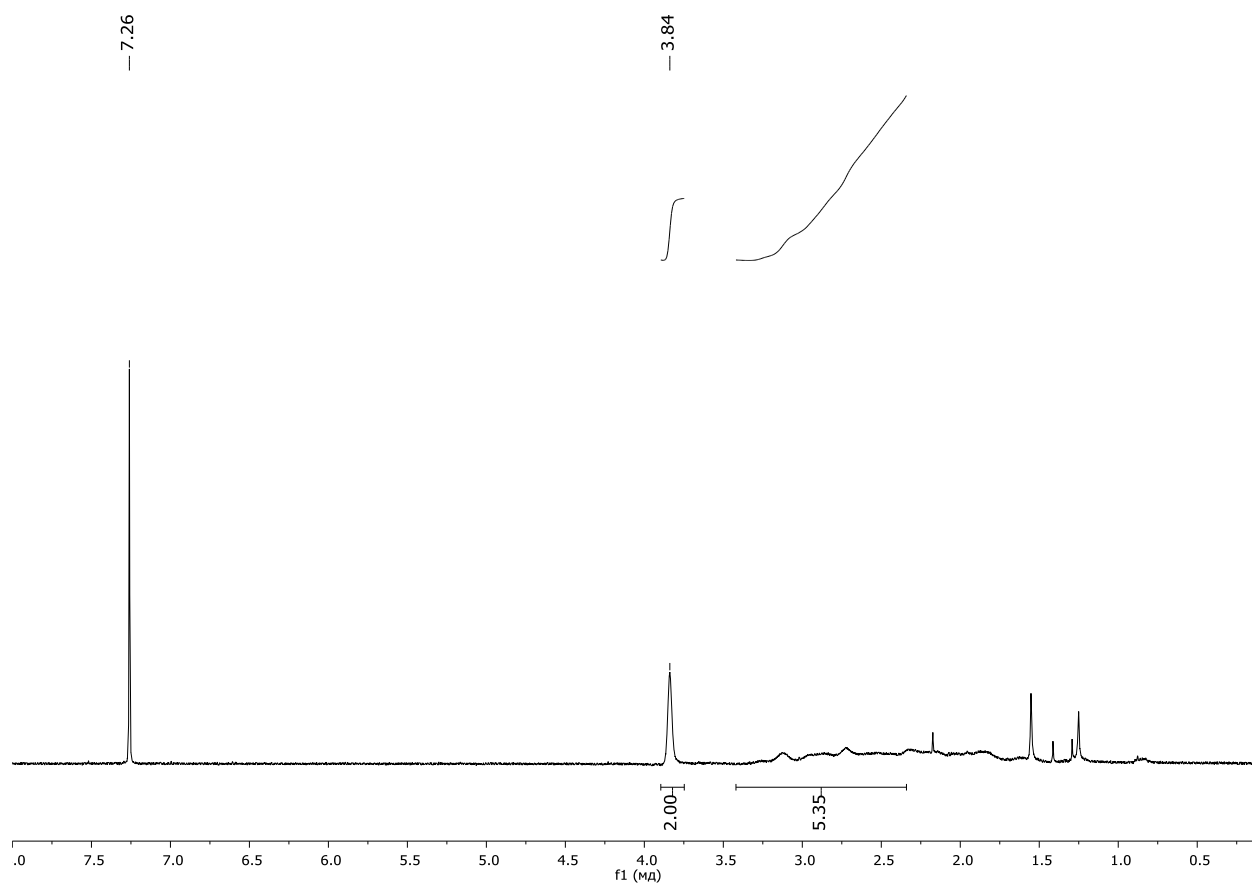

**Figure S13.**  $^1\text{H}$  NMR spectrum of 3-I-1,2- $\text{C}_2\text{B}_{10}\text{H}_{11}$  (**5**) in  $\text{CDCl}_3$ .

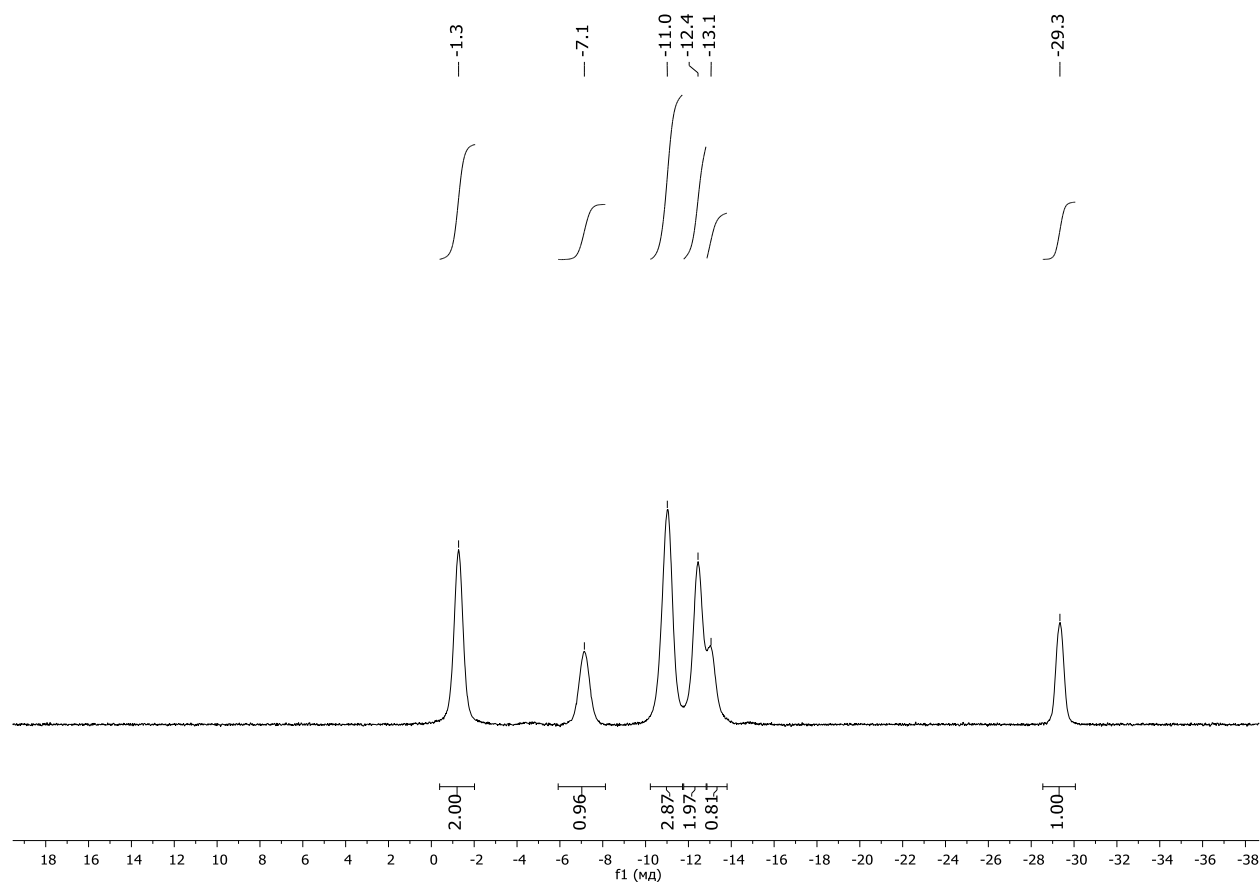

**Figure S14.**  $^{11}\text{B}\{^1\text{H}\}$  NMR spectrum of 3-I-1,2- $\text{C}_2\text{B}_{10}\text{H}_{11}$  (**5**) in  $\text{CDCl}_3$ .



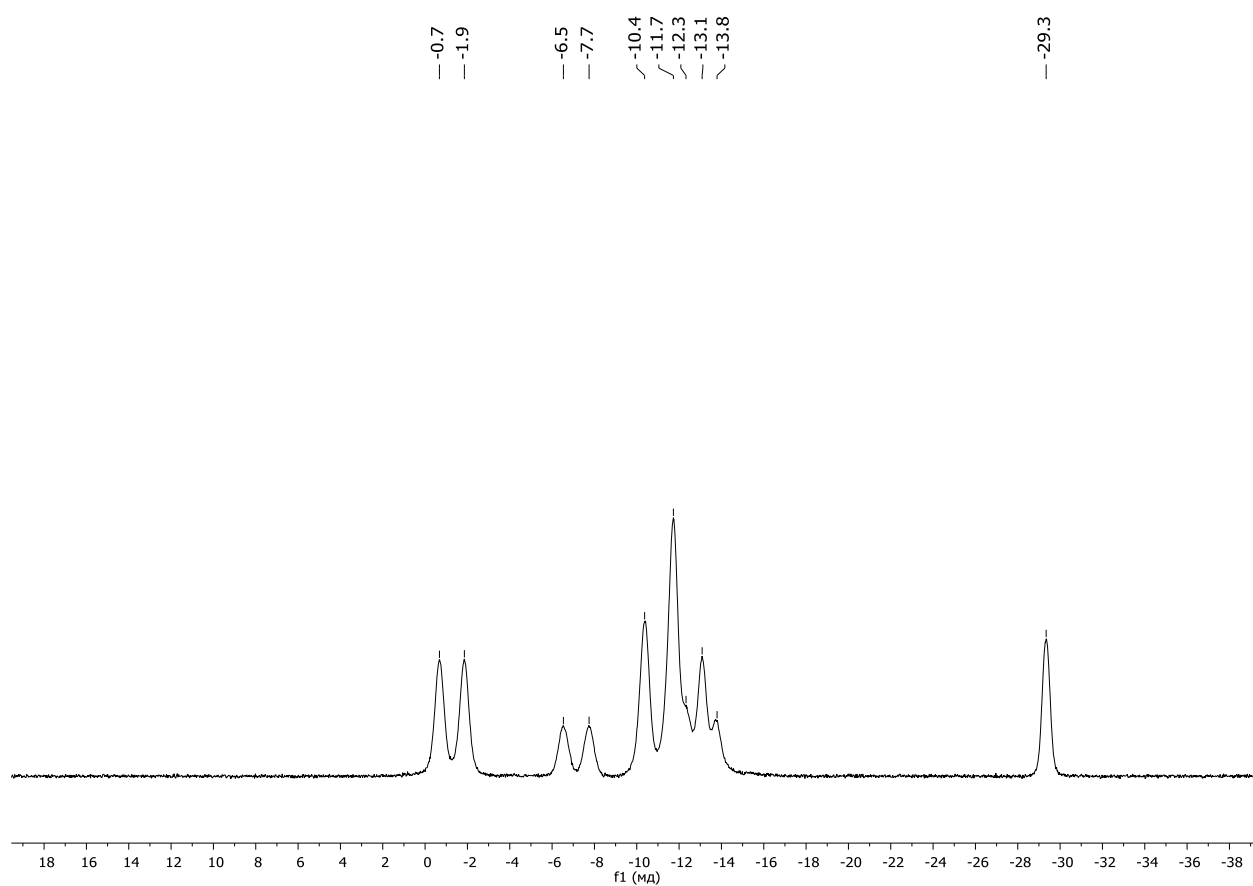

**Figure S15.**  $^{11}\text{B}$  NMR spectrum of 3-I-1,2- $\text{C}_2\text{B}_{10}\text{H}_{11}$  (**5**) in  $\text{CDCl}_3$ .

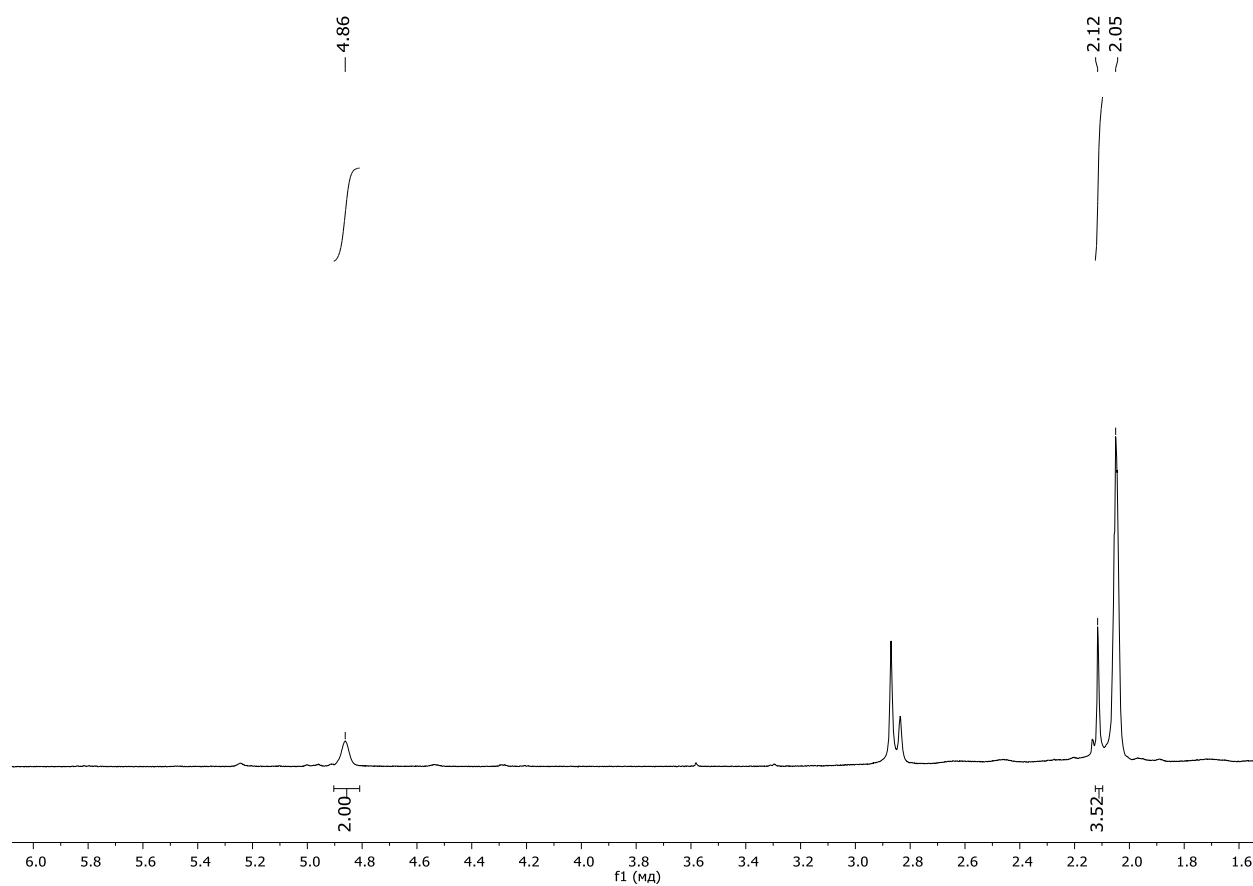

**Figure S16.**  $^1\text{H}$  NMR spectrum of 3-AcO-1,2- $\text{C}_2\text{B}_{10}\text{H}_{11}$  (**6**) in acetone- $d_6$ .

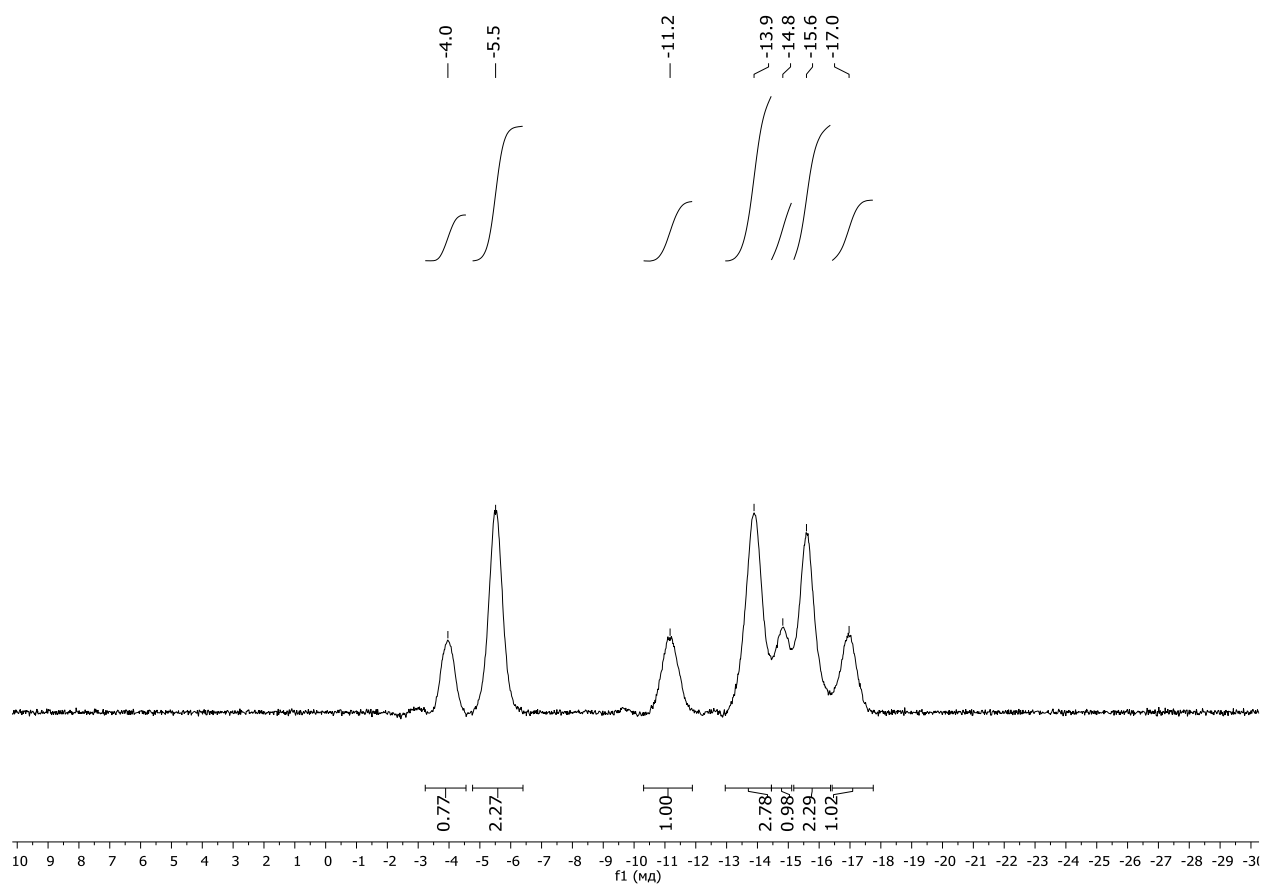

**Figure S17.**  $^{11}\text{B}\{^1\text{H}\}$  NMR spectrum of 3-AcO-1,2- $\text{C}_2\text{B}_{10}\text{H}_{11}$  (**6**) in acetone- $d_6$ .

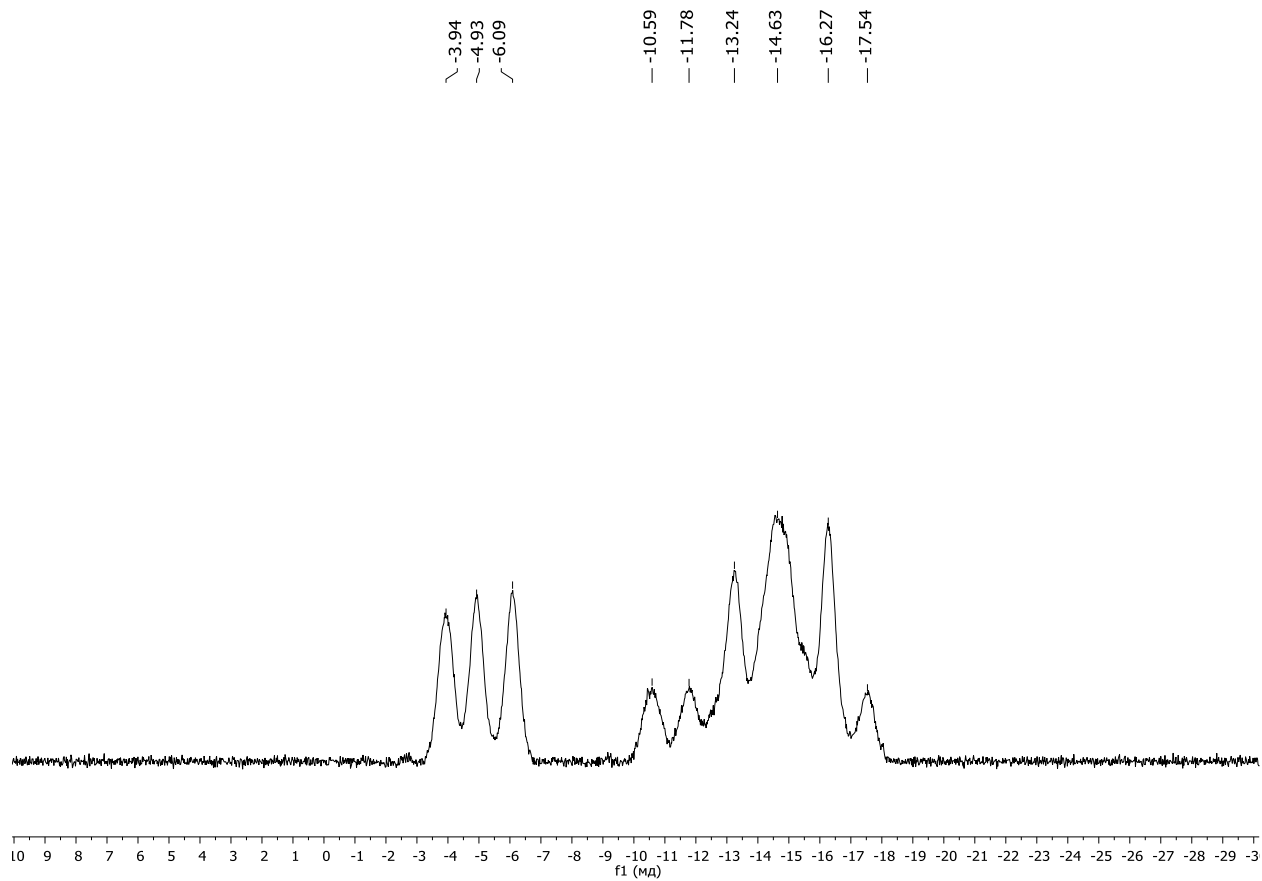

**Figure S18.**  $^{11}\text{B}$  NMR spectrum of 3-AcO-1,2- $\text{C}_2\text{B}_{10}\text{H}_{11}$  (**6**) in acetone- $d_6$ .

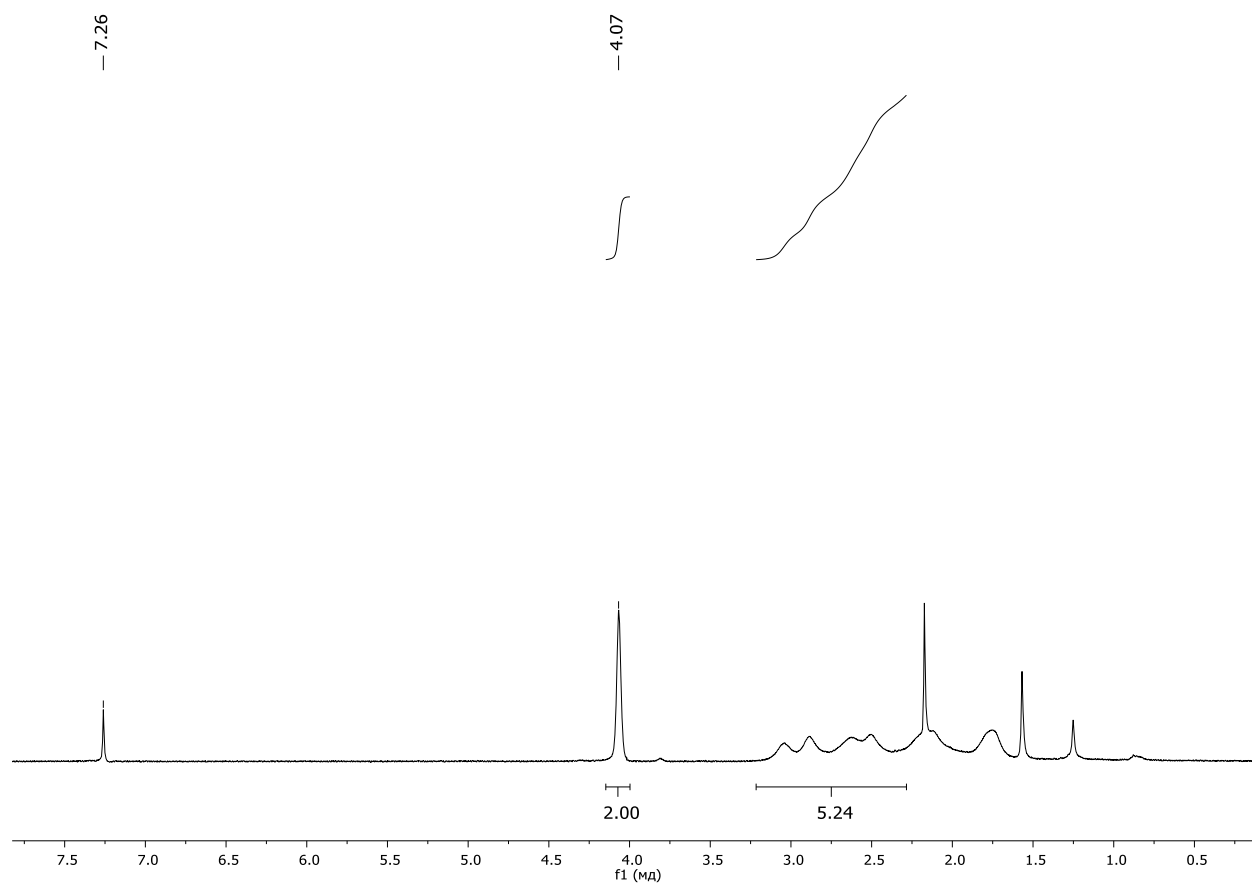

**Figure S19.** <sup>1</sup>H NMR spectrum of 3,6-Cl<sub>2</sub>-1,2-C<sub>2</sub>B<sub>10</sub>H<sub>10</sub> (**7**) in CDCl<sub>3</sub>.

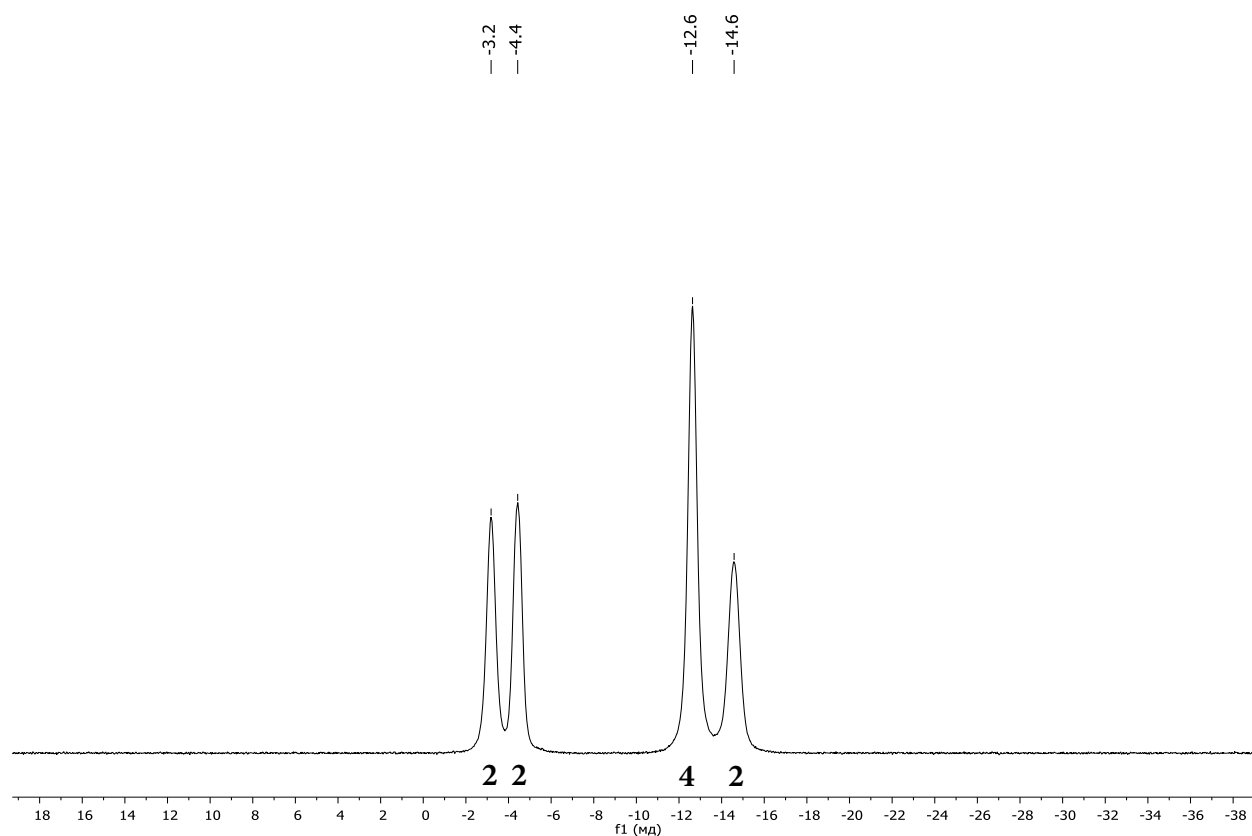

**Figure S20.** <sup>11</sup>B{<sup>1</sup>H} NMR spectrum of 3,6-Cl<sub>2</sub>-1,2-C<sub>2</sub>B<sub>10</sub>H<sub>10</sub> (**7**) in CDCl<sub>3</sub>.

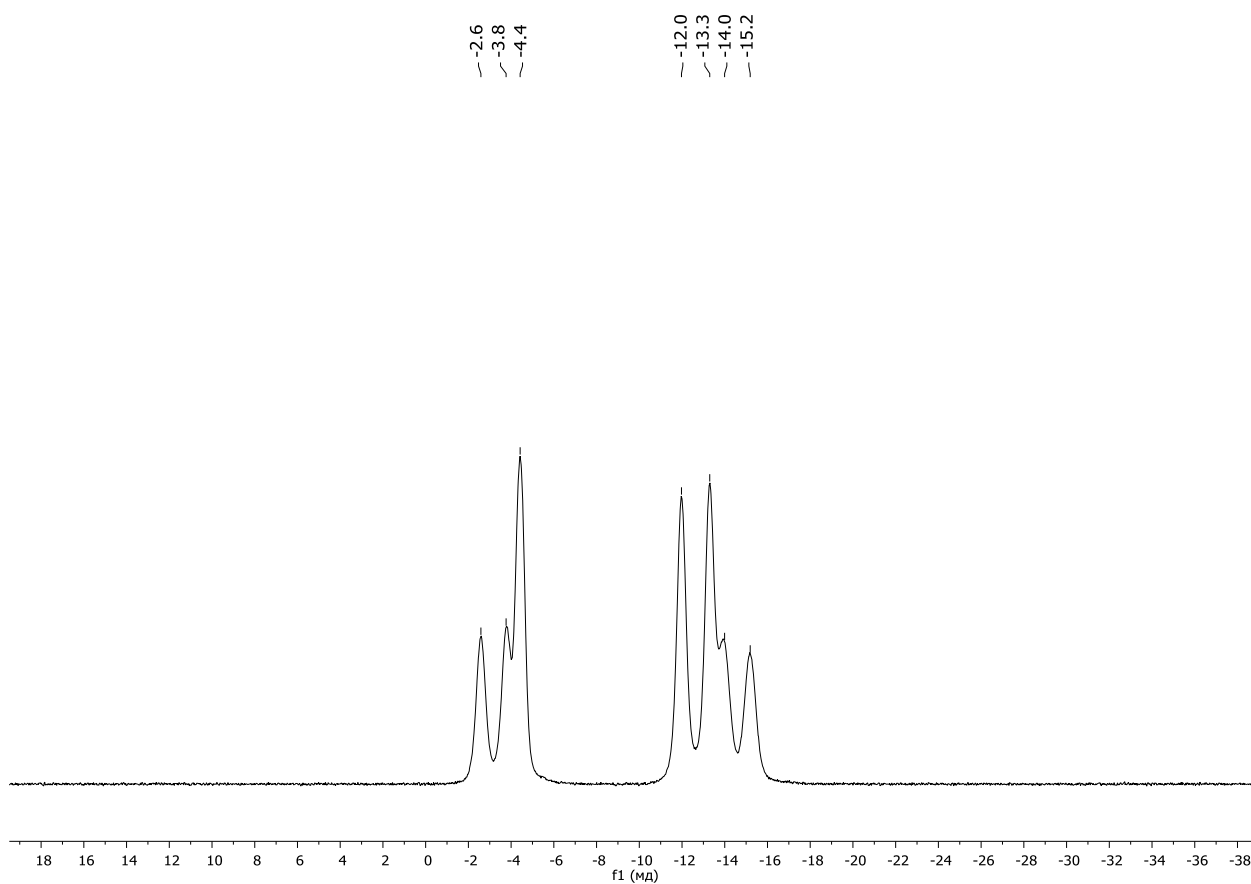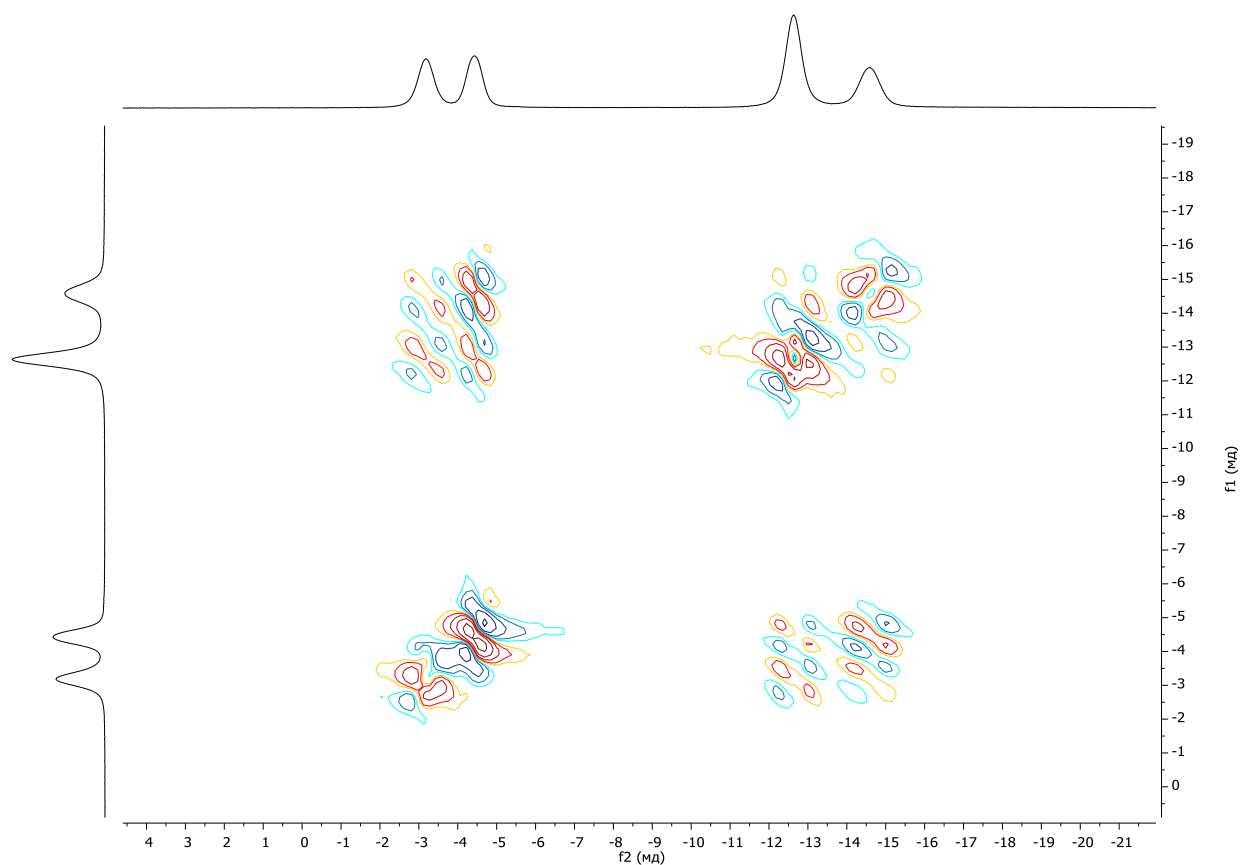

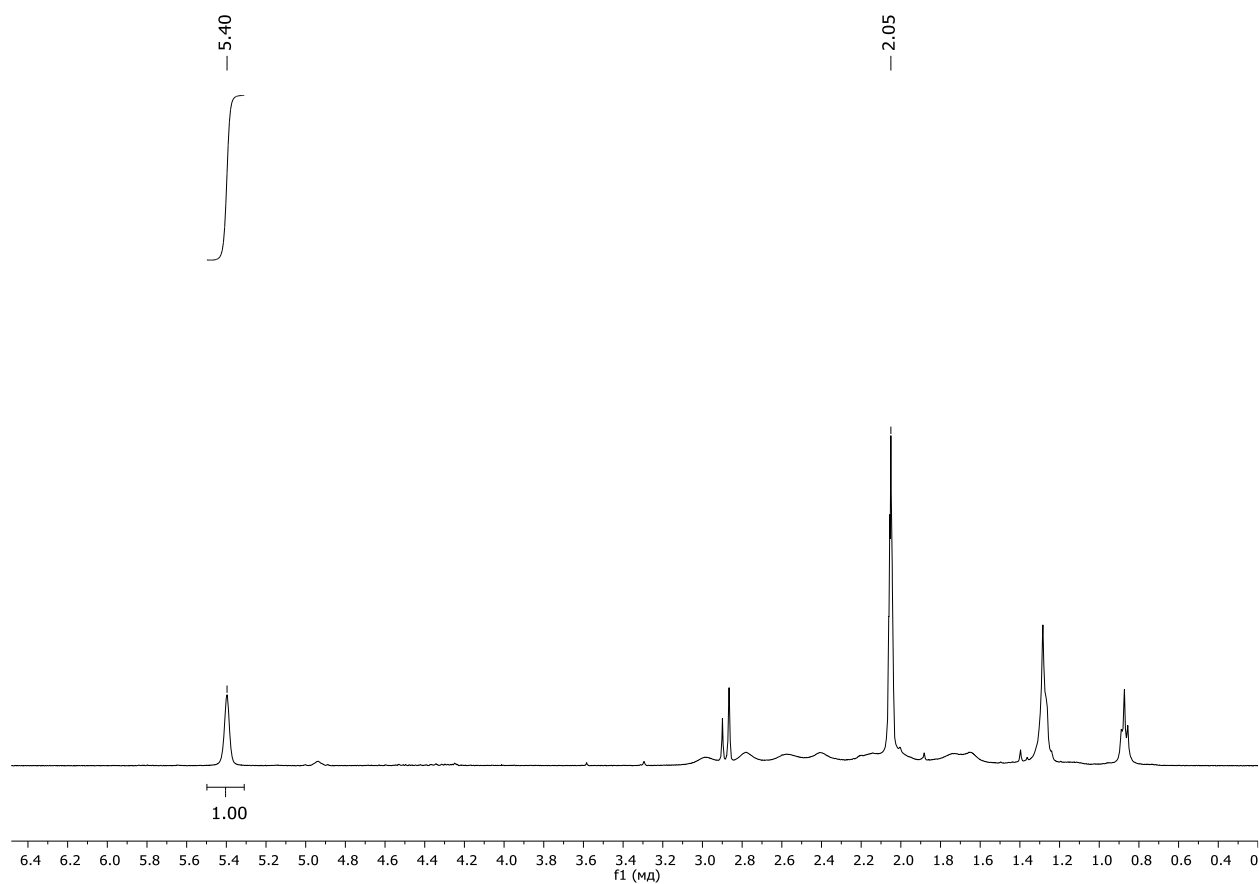

**Figure S23.** <sup>1</sup>H NMR spectrum of 3,6-Cl<sub>2</sub>-1,2-C<sub>2</sub>B<sub>10</sub>H<sub>10</sub> (**7**) in acetone-*d*<sub>6</sub>.

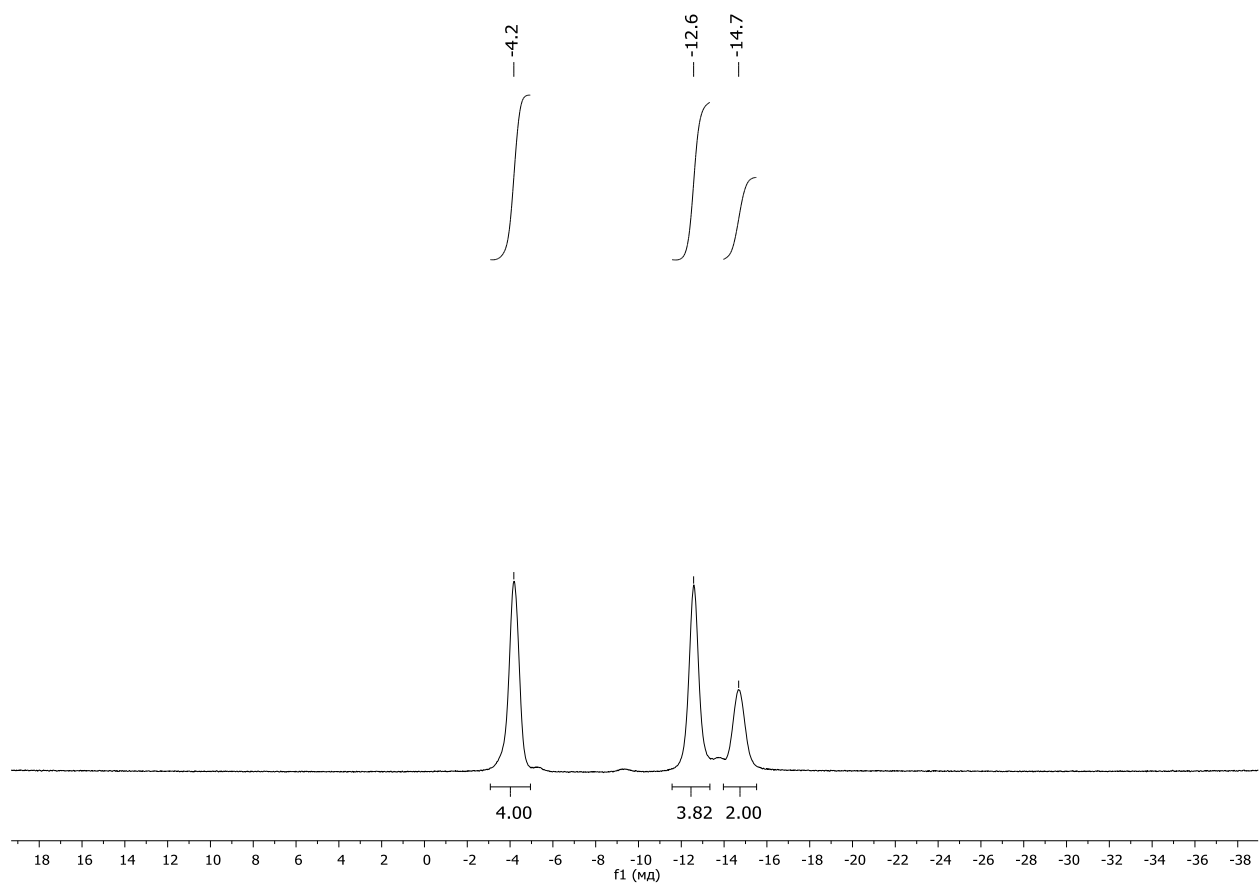

**Figure S24.** <sup>11</sup>B{<sup>1</sup>H} NMR spectrum of 3,6-Cl<sub>2</sub>-1,2-C<sub>2</sub>B<sub>10</sub>H<sub>10</sub> (**7**) in acetone-*d*<sub>6</sub>.

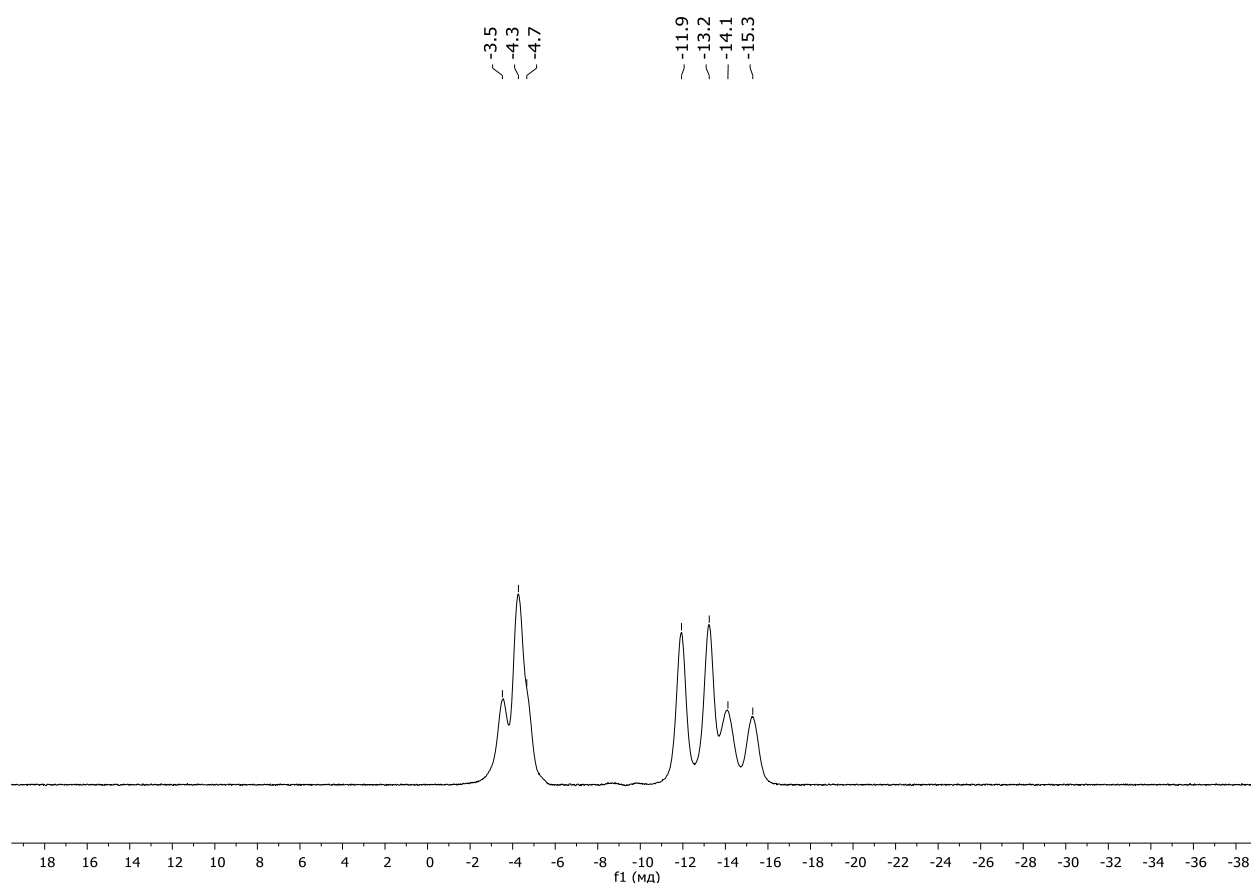

**Figure S25.**  $^{11}\text{B}$  NMR spectrum of 3,6- $\text{Cl}_2$ -1,2- $\text{C}_2\text{B}_{10}\text{H}_{10}$  (**7**) in acetone- $d_6$ .

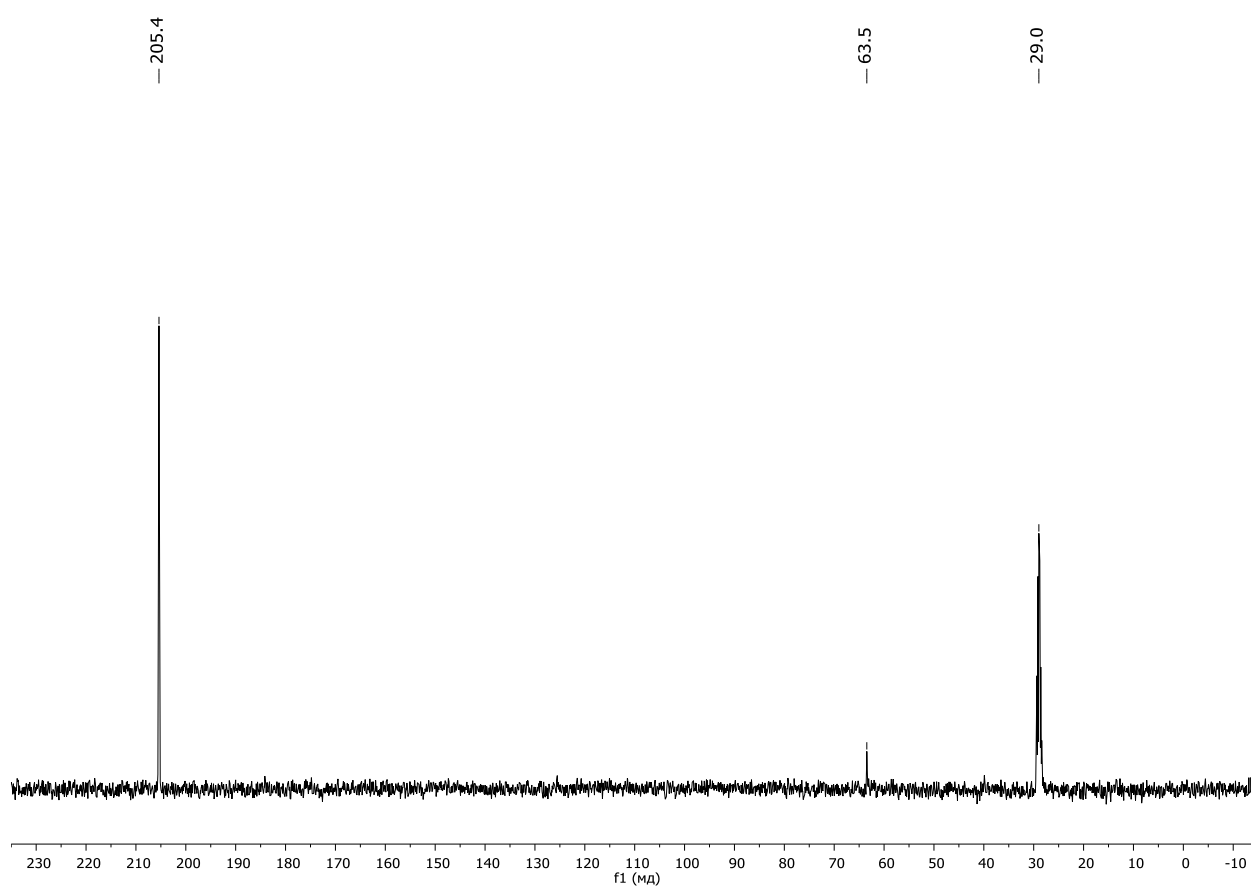

**Figure S26.**  $^{13}\text{C}$  NMR spectrum of 3,6- $\text{Cl}_2$ -1,2- $\text{C}_2\text{B}_{10}\text{H}_{10}$  (**7**) in acetone- $d_6$ .

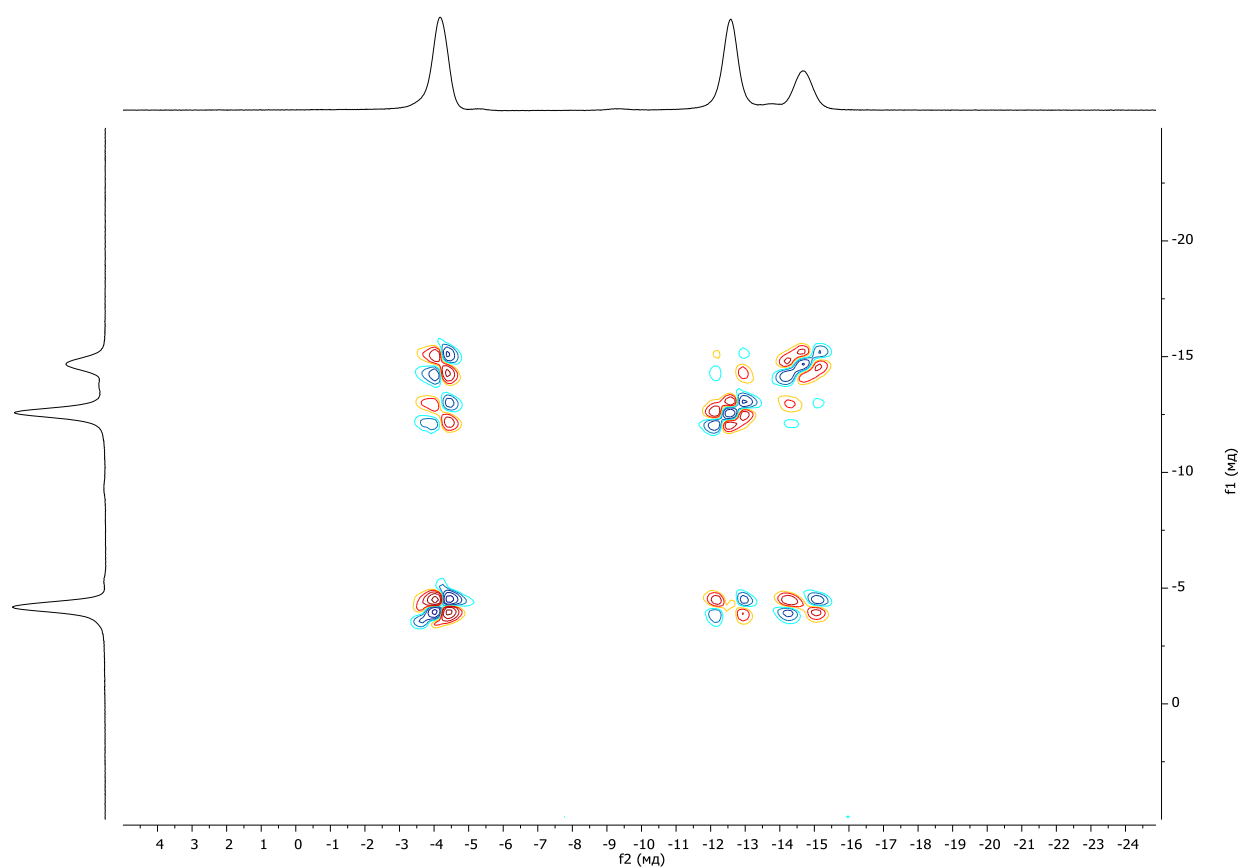

**Figure S27.**  $^{11}\text{B}$ - $^{11}\text{B}$  gDQCOSY NMR spectrum of 3,6- $\text{Cl}_2$ -1,2- $\text{C}_2\text{B}_{10}\text{H}_{10}$  (**7**) in acetone- $d_6$ .

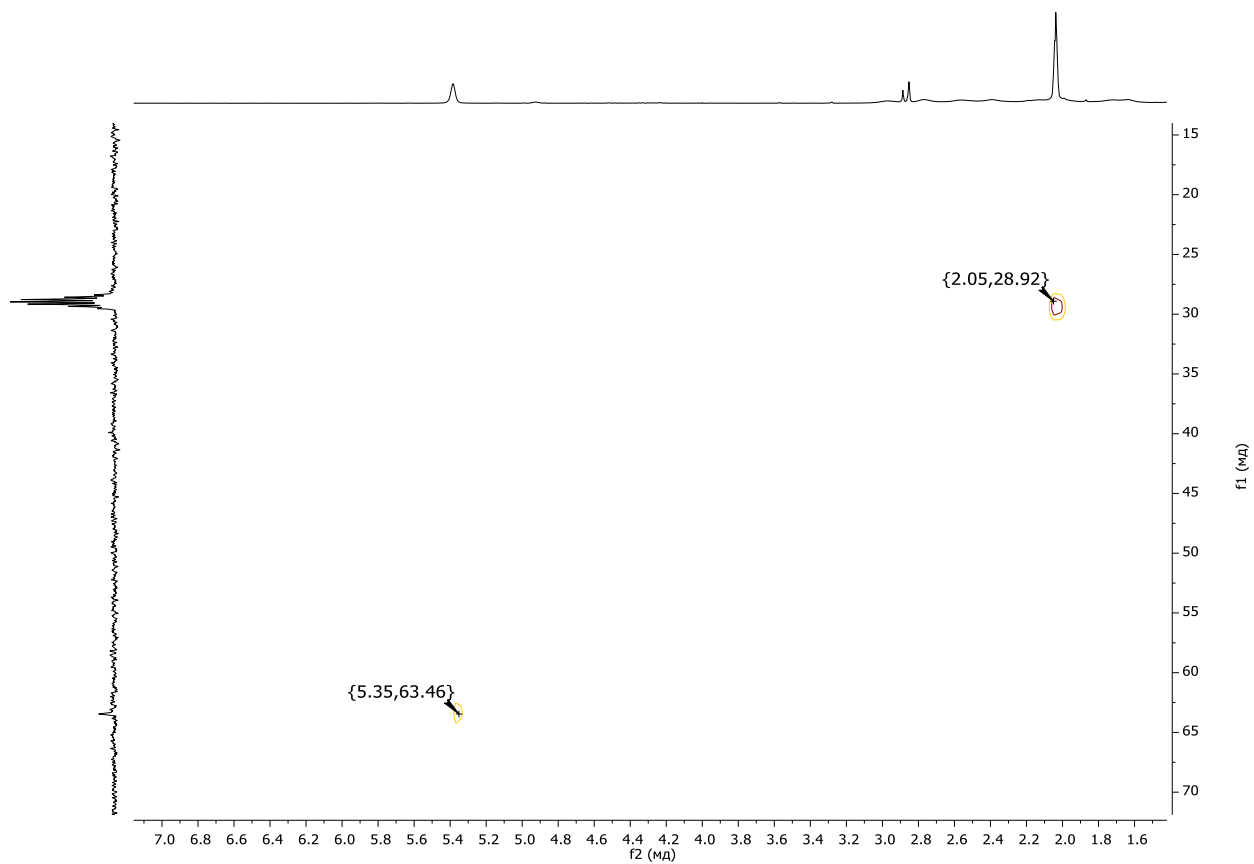

**Figure S28.**  $^1\text{H}$ - $^{13}\text{C}$  HMQC NMR spectrum of 3,6- $\text{Cl}_2$ -1,2- $\text{C}_2\text{B}_{10}\text{H}_{10}$  (**7**) in acetone- $d_6$ .

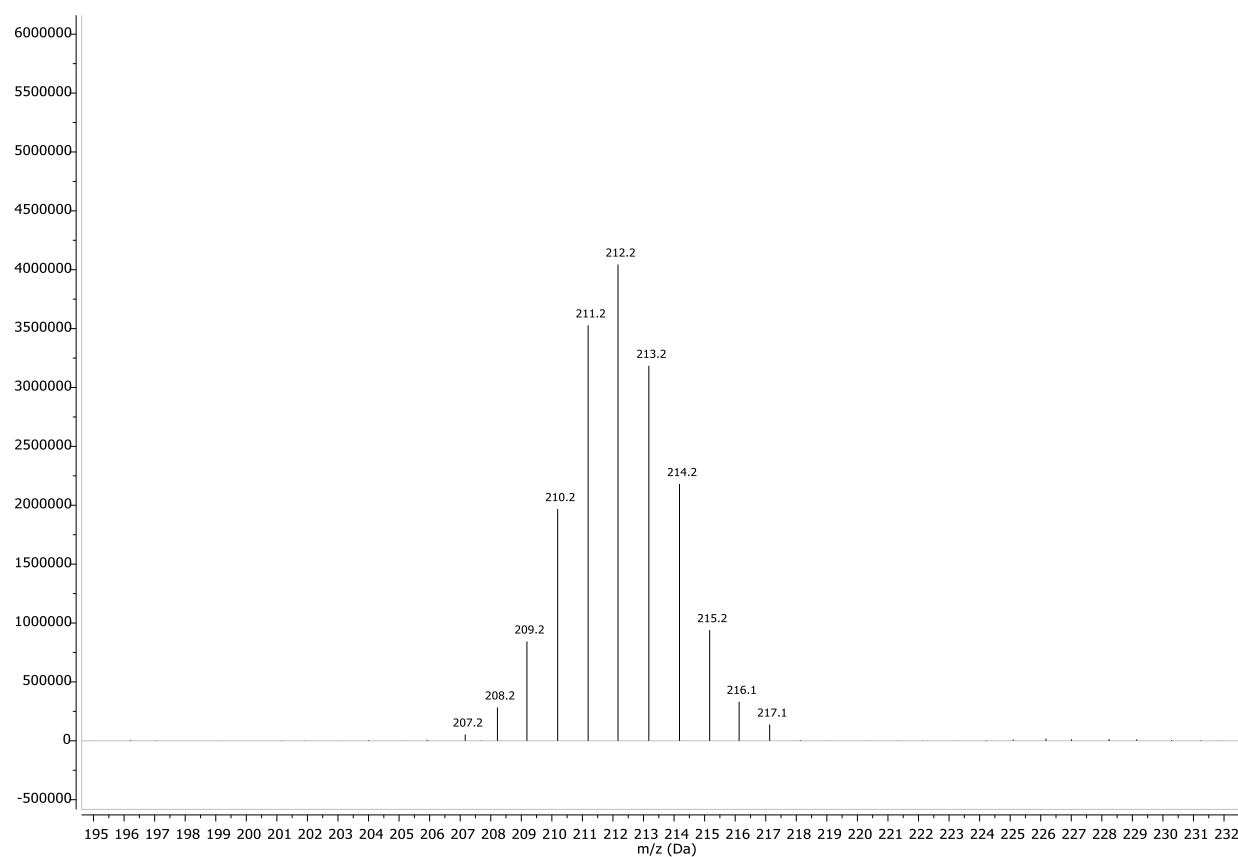

**Figure S29.** Mass-spectrum (DUIS) of 3,6-Cl<sub>2</sub>-1,2-C<sub>2</sub>B<sub>10</sub>H<sub>10</sub> (**7**).

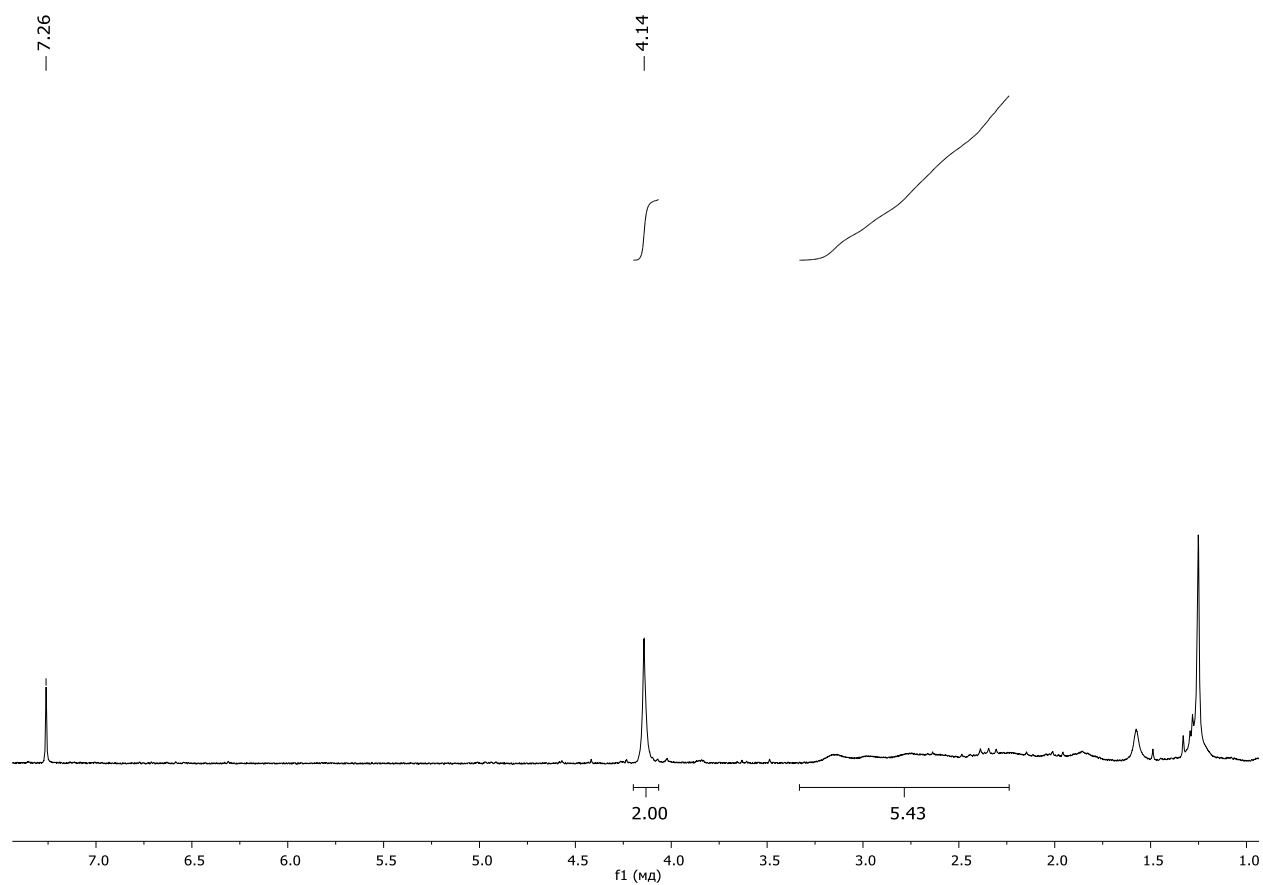

**Figure S30.** <sup>1</sup>H NMR spectrum of 3,6-Br<sub>2</sub>-1,2-C<sub>2</sub>B<sub>10</sub>H<sub>10</sub> (**8**) in CDCl<sub>3</sub>.



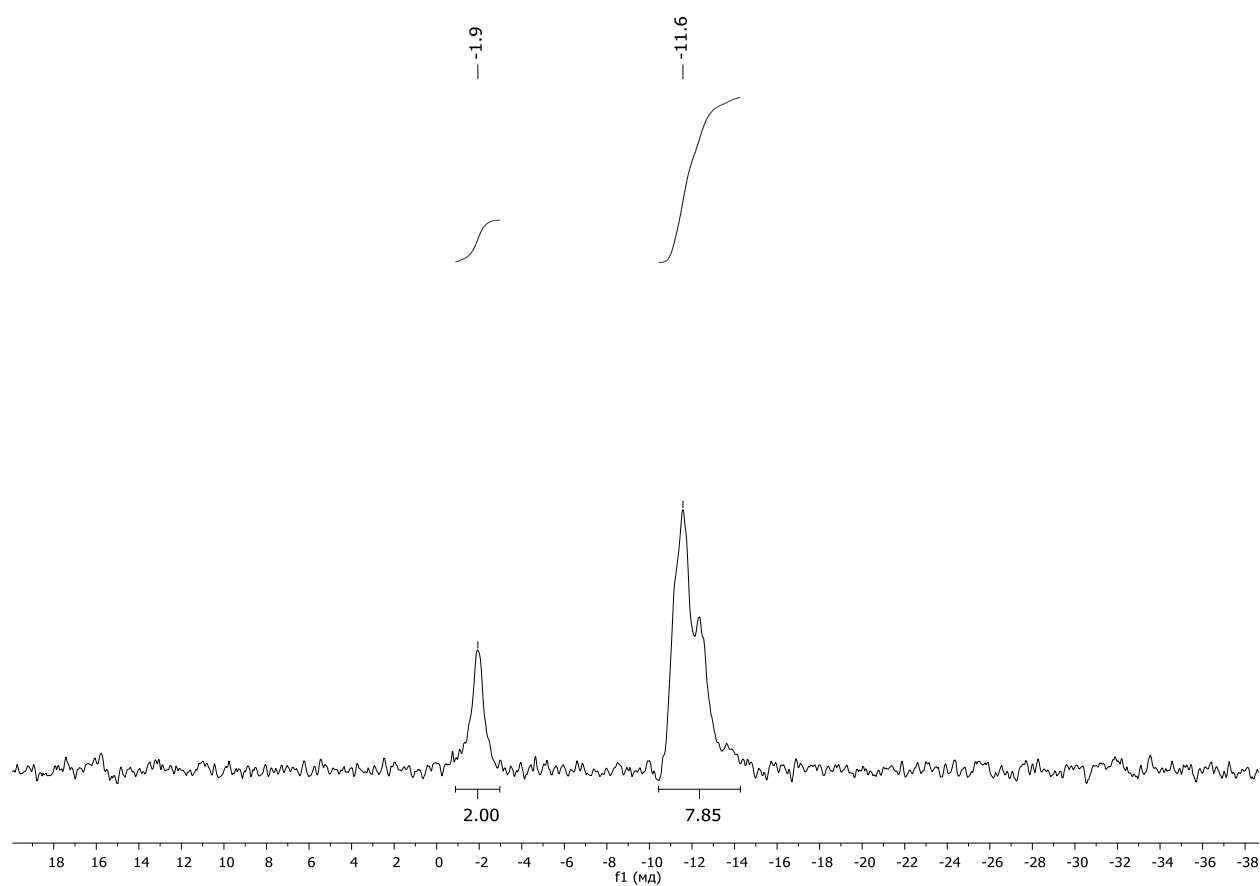

**Figure S31.**  $^{11}\text{B}\{^1\text{H}\}$  NMR spectrum of 3,6- $\text{Br}_2$ -1,2- $\text{C}_2\text{B}_{10}\text{H}_{10}$  (**8**) in  $\text{CDCl}_3$ .

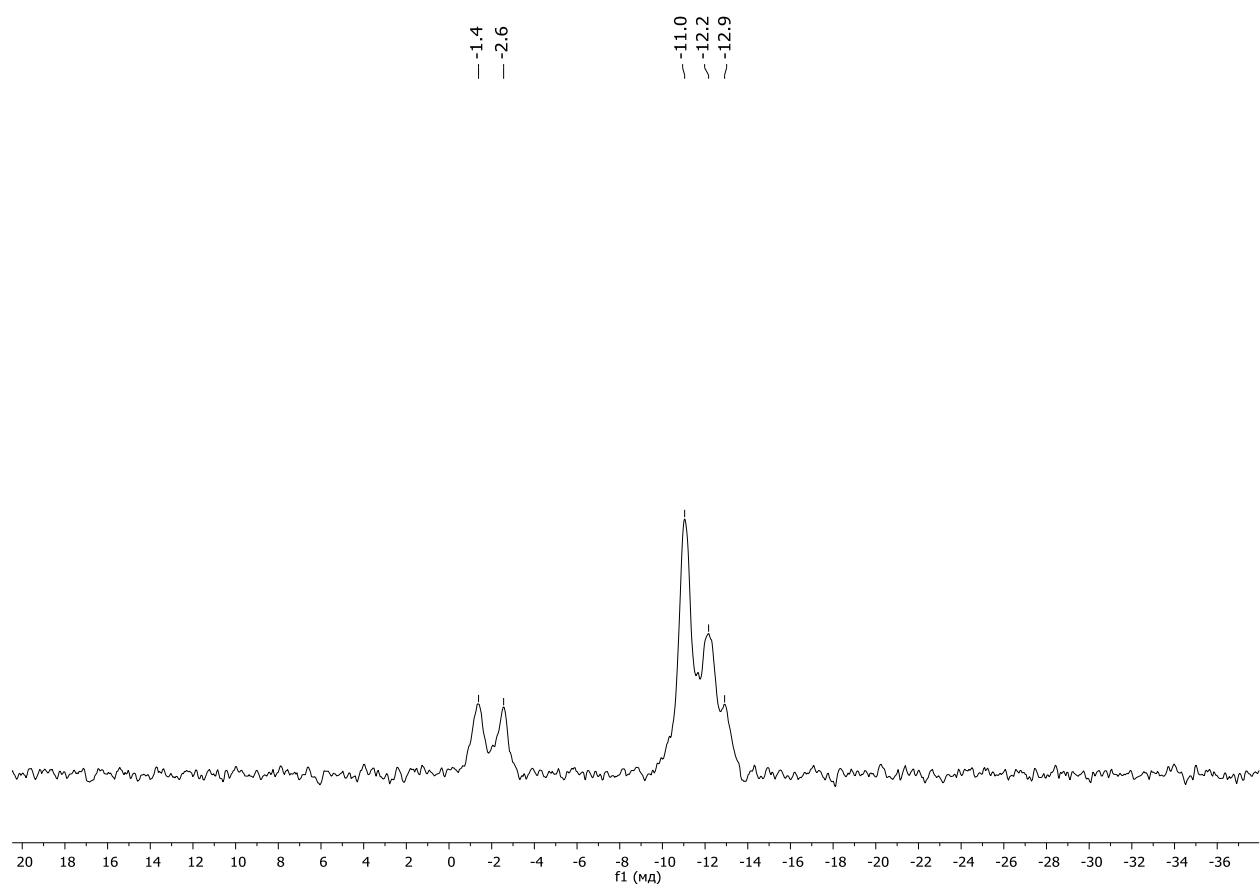

**Figure S32.**  $^{11}\text{B}$  NMR spectrum of 3,6- $\text{Br}_2$ -1,2- $\text{C}_2\text{B}_{10}\text{H}_{10}$  (**8**) in  $\text{CDCl}_3$ .

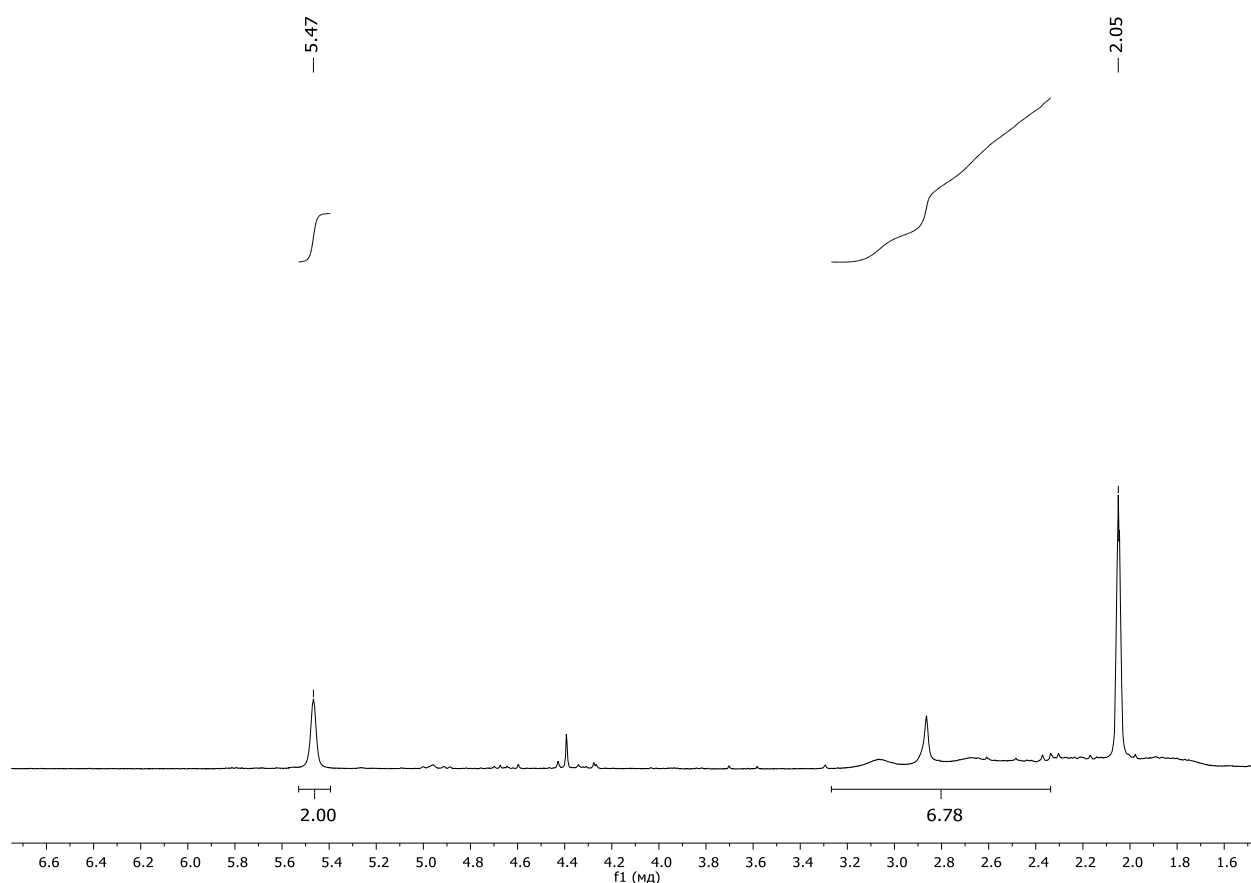

**Figure S33.** <sup>1</sup>H NMR spectrum of 3,6-Br<sub>2</sub>-1,2-C<sub>2</sub>B<sub>10</sub>H<sub>10</sub> (**8**) in acetone-*d*<sub>6</sub>.

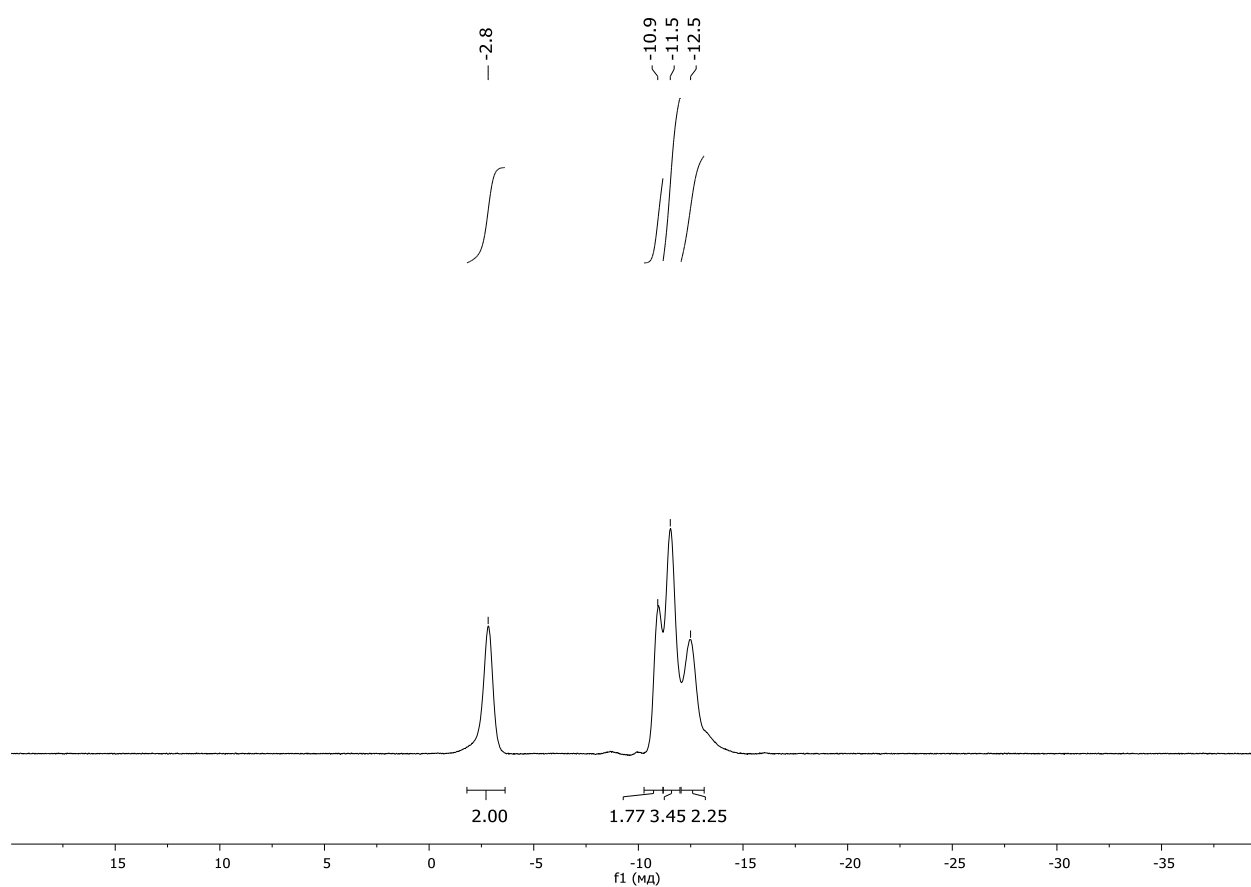

**Figure S34.** <sup>11</sup>B{<sup>1</sup>H} NMR spectrum of 3,6-Br<sub>2</sub>-1,2-C<sub>2</sub>B<sub>10</sub>H<sub>10</sub> (**8**) in acetone-*d*<sub>6</sub>.

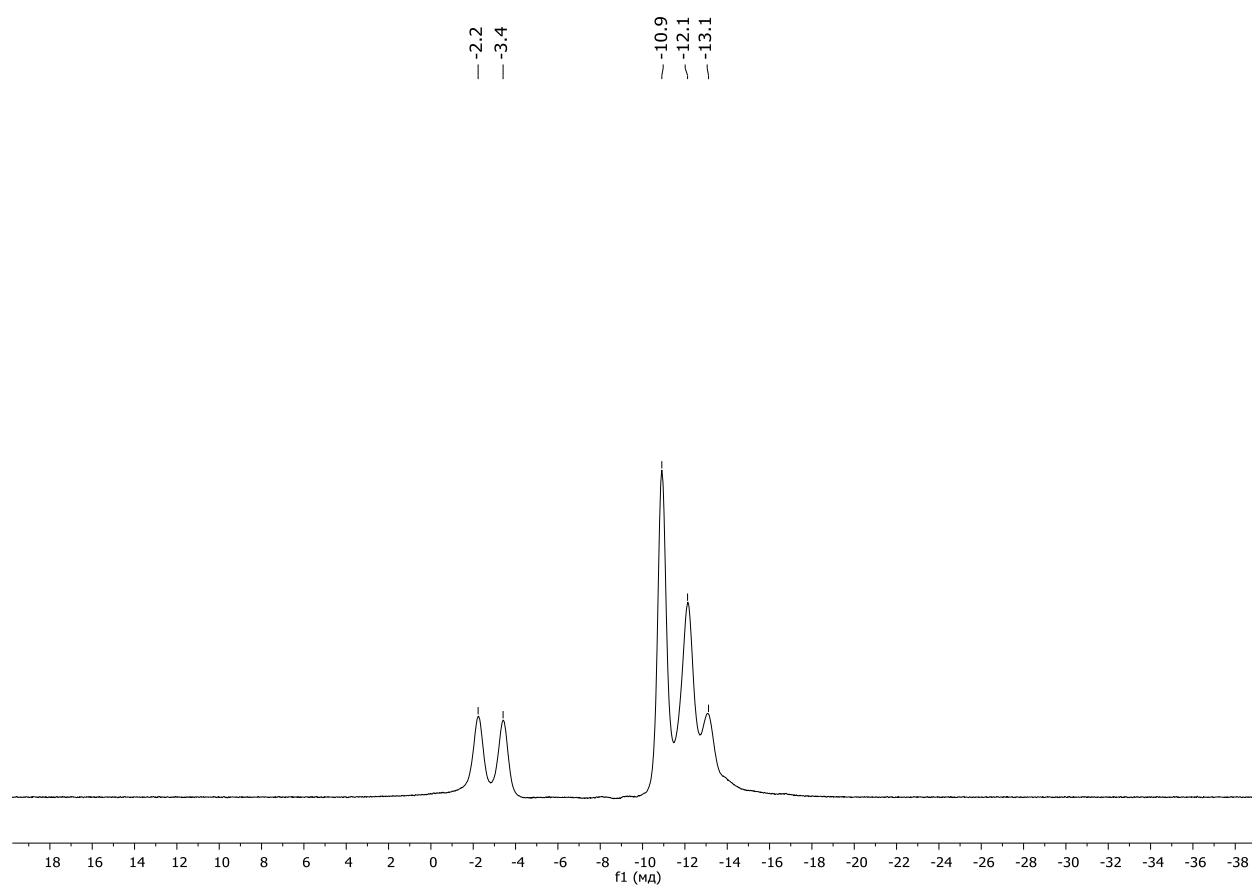

**Figure S35.**  $^{11}\text{B}$  NMR spectrum of 3,6-Br<sub>2</sub>-1,2-C<sub>2</sub>B<sub>10</sub>H<sub>10</sub> (**8**) in acetone-*d*<sub>6</sub>.

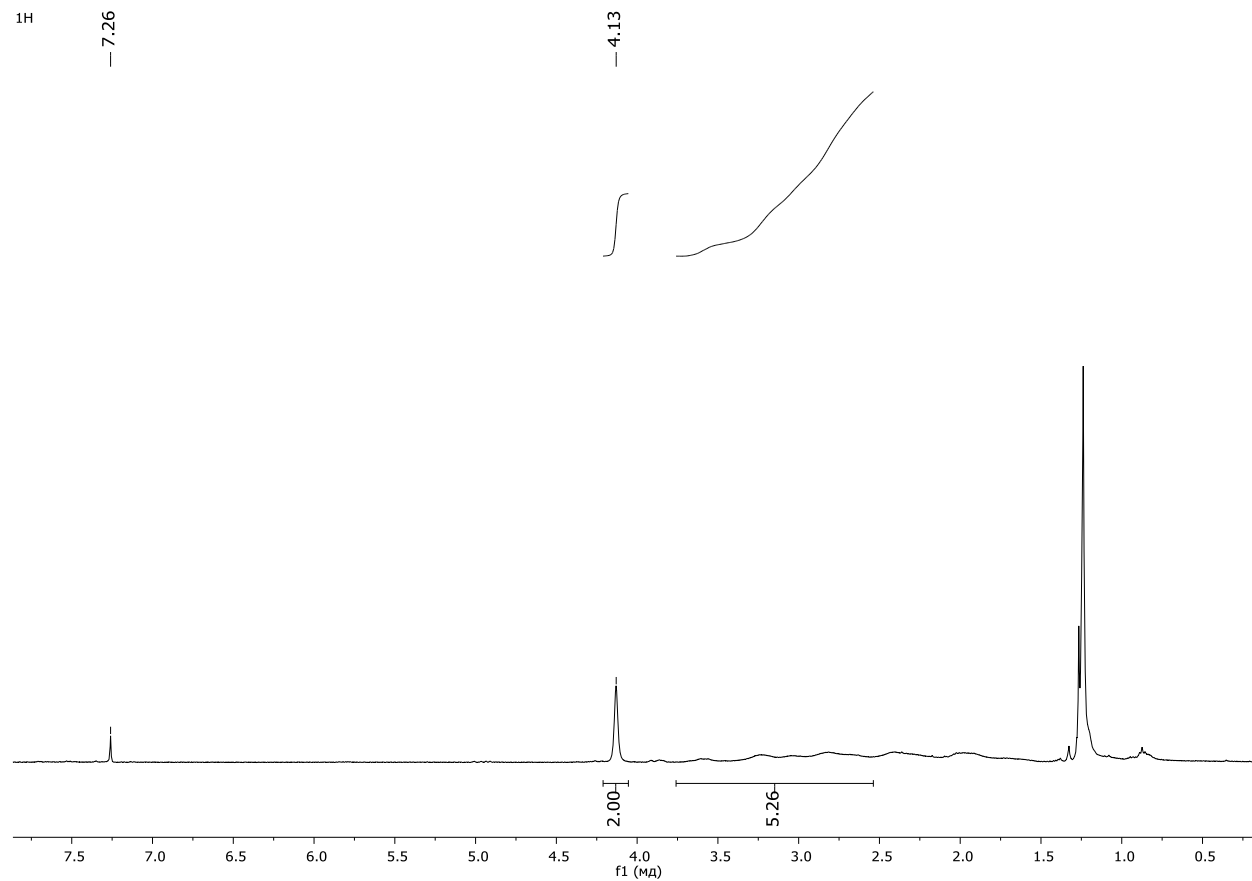

**Figure S36.**  $^1\text{H}$  NMR spectrum of 3,6-I<sub>2</sub>-1,2-C<sub>2</sub>B<sub>10</sub>H<sub>10</sub> (**9**) in CDCl<sub>3</sub>.

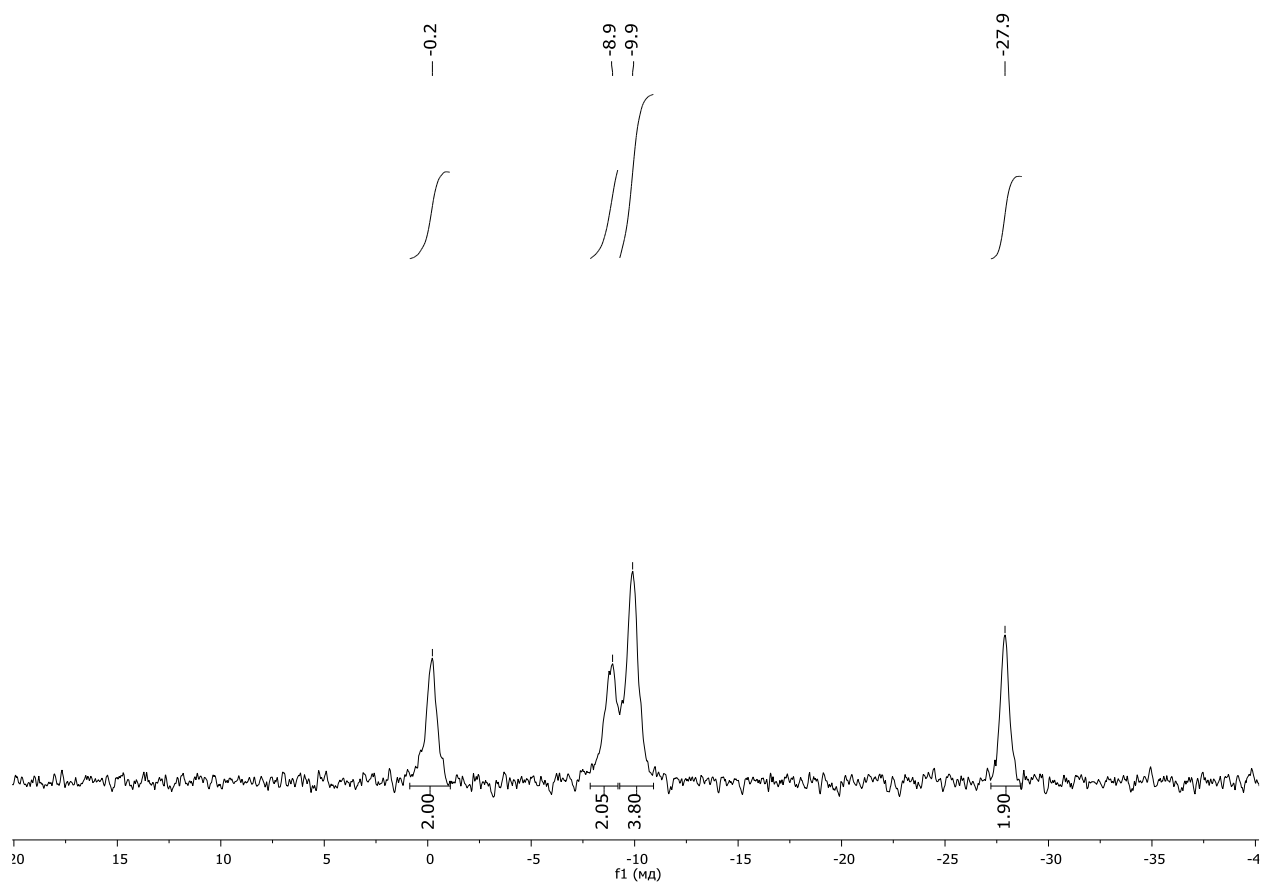

**Figure S37.**  $^{11}\text{B}\{^1\text{H}\}$  NMR spectrum of 3,6- $\text{I}_2$ -1,2- $\text{C}_2\text{B}_{10}\text{H}_{10}$  (**9**) in  $\text{CDCl}_3$ .

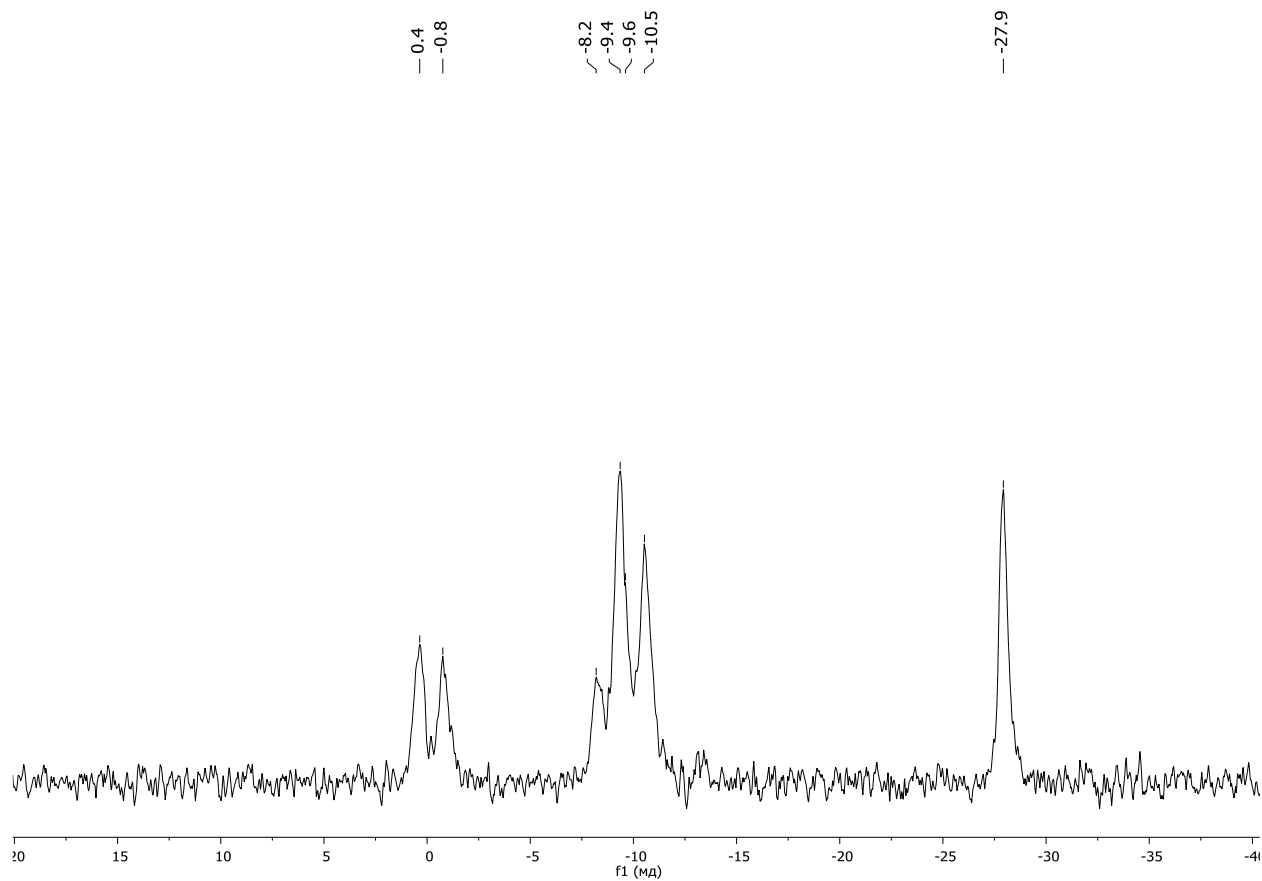

**Figure S38.**  $^{11}\text{B}$  NMR spectrum of 3,6- $\text{I}_2$ -1,2- $\text{C}_2\text{B}_{10}\text{H}_{10}$  (**9**) in  $\text{CDCl}_3$ .

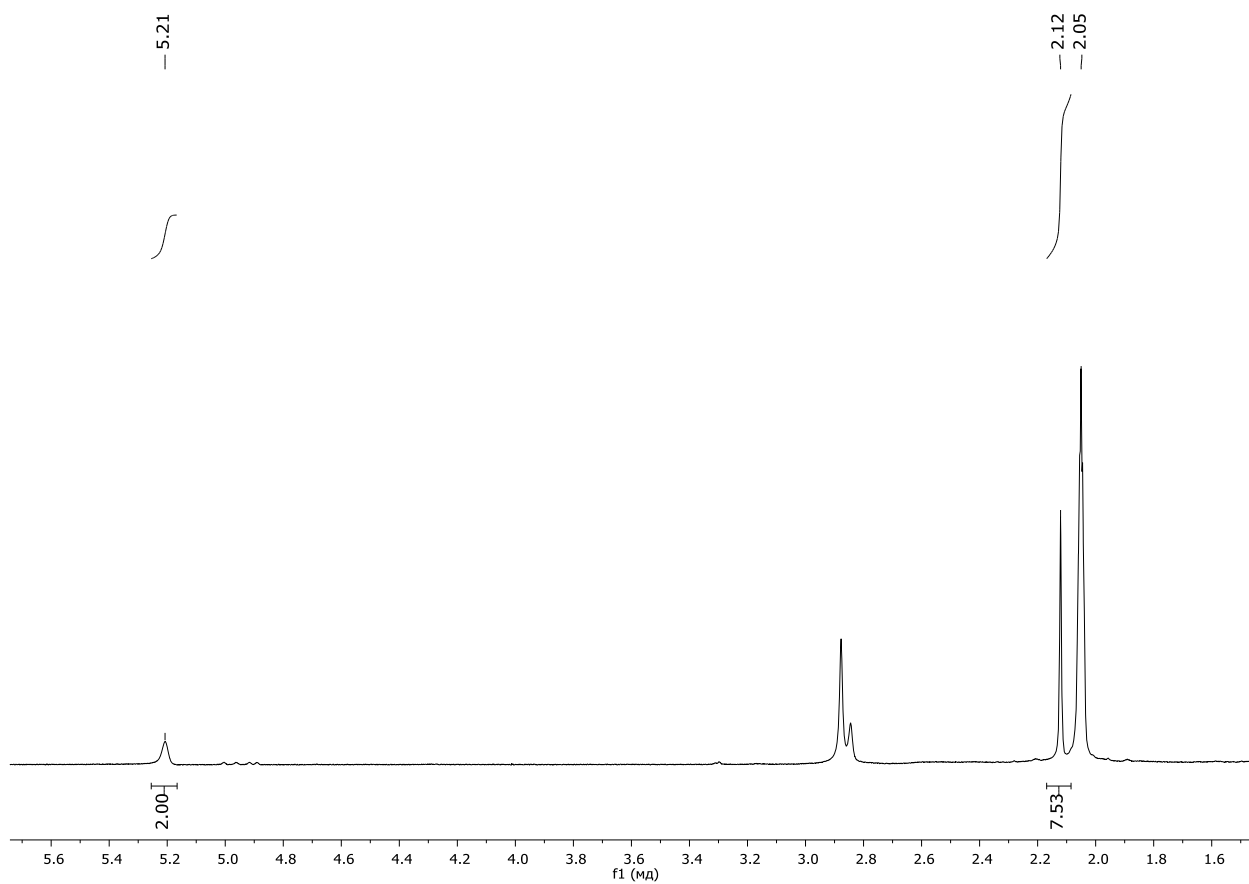

**Figure S39.**  $^1\text{H}$  NMR spectrum of 3,6-(AcO)<sub>2</sub>-1,2-C<sub>2</sub>B<sub>10</sub>H<sub>10</sub> (**10**) in acetone-*d*<sub>6</sub>.

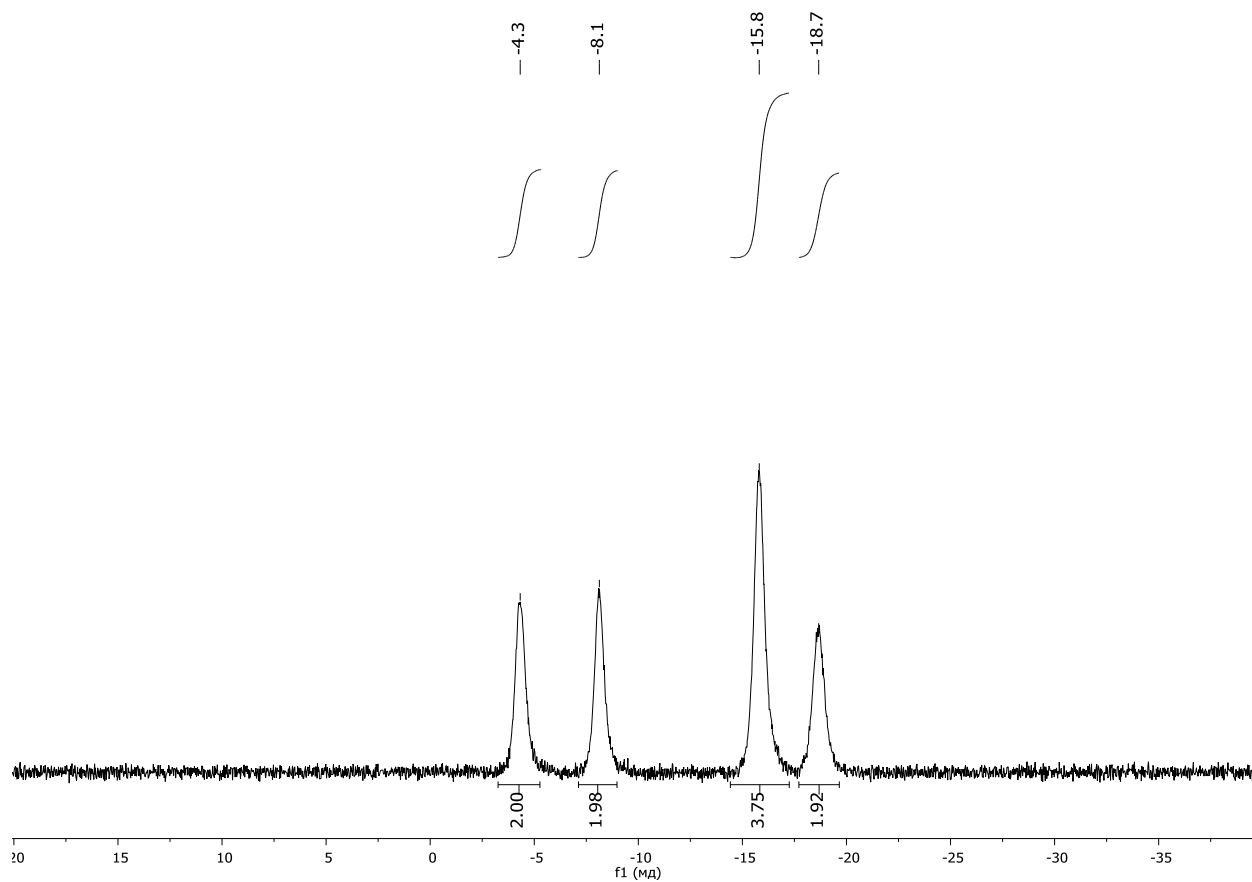

**Figure S40.**  $^{11}\text{B}\{^1\text{H}\}$  NMR spectrum of 3,6-(AcO)<sub>2</sub>-1,2-C<sub>2</sub>B<sub>10</sub>H<sub>10</sub> (**10**) in acetone-*d*<sub>6</sub>.

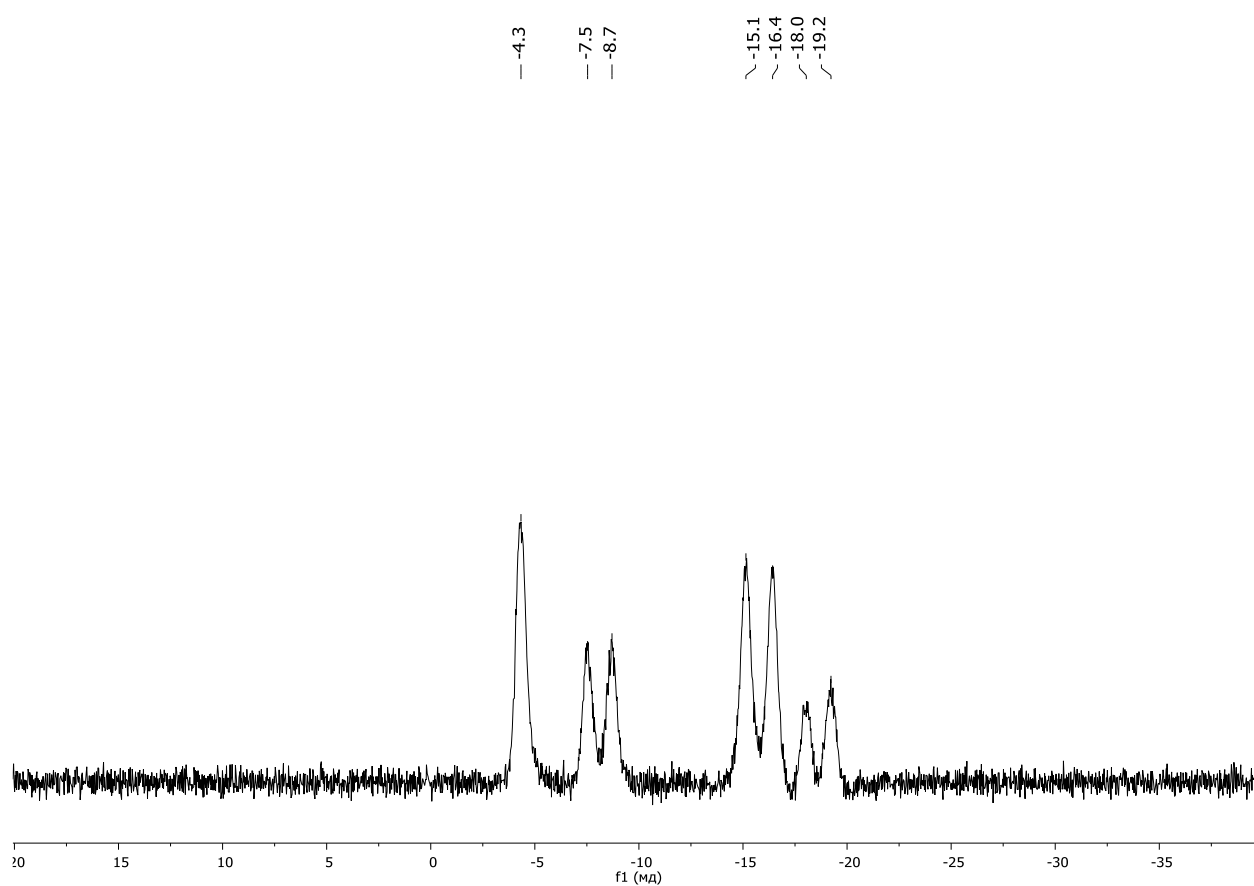

**Figure S41.**  $^{11}\text{B}$  NMR spectrum of 3,6-(AcO) $_2$ -1,2-C $_2\text{B}_{10}\text{H}_{10}$  (**10**) in acetone- $d_6$ .

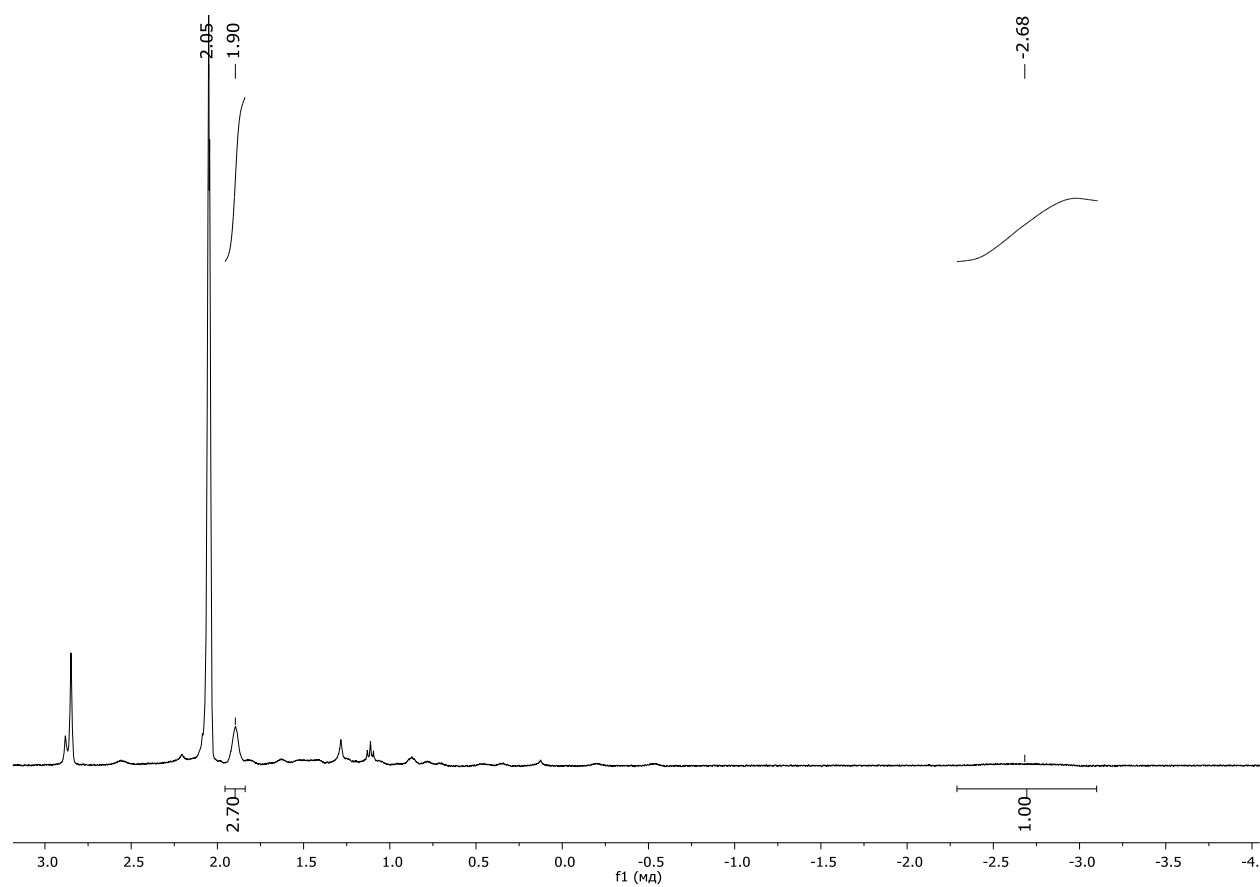

**Figure S42.**  $^1\text{H}$  NMR spectrum of Cs[3-Cl-7,8-C $_2\text{B}_9\text{H}_{11}$ ] (**11**) in acetone- $d_6$ .

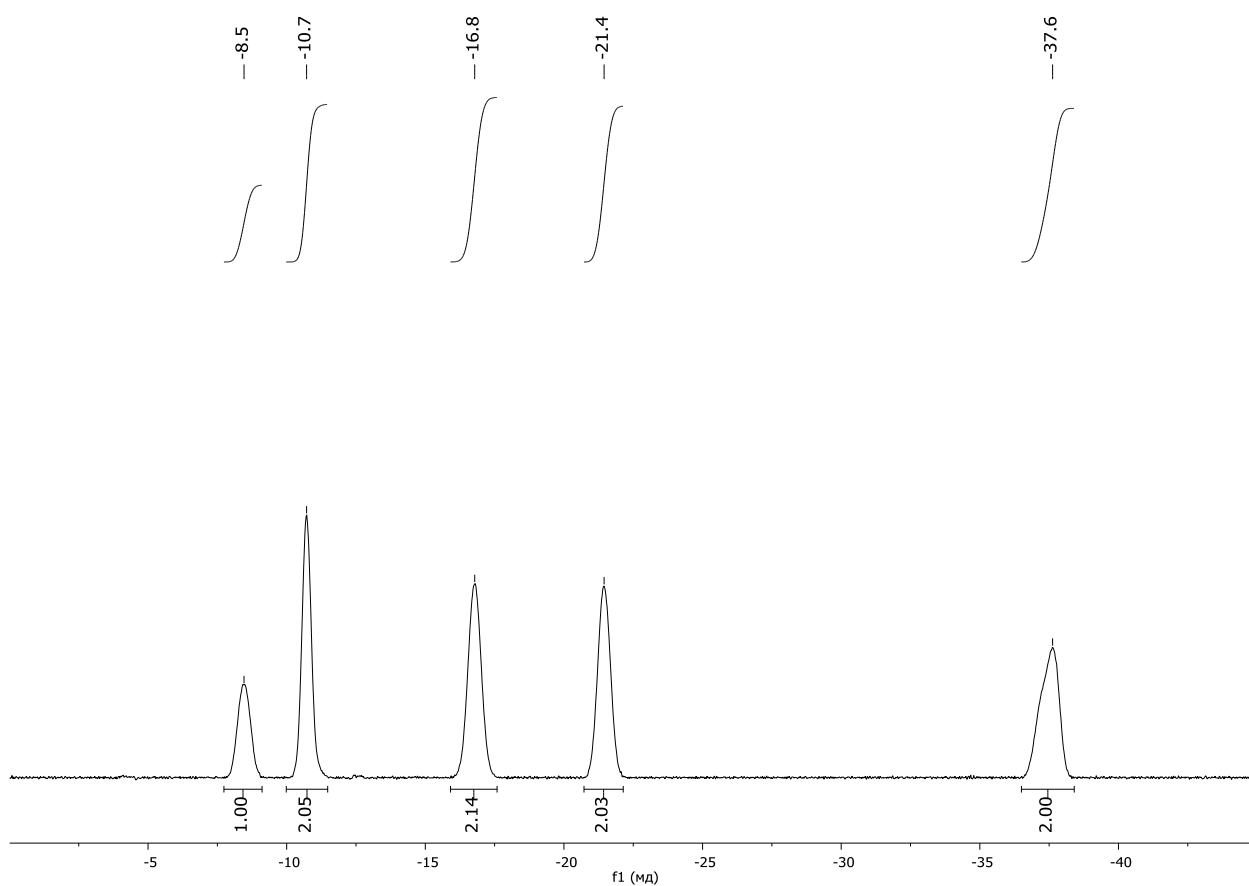

**Figure S43.**  $^{11}\text{B}\{^1\text{H}\}$  NMR spectrum of  $\text{Cs}[3\text{-Cl-7,8-C}_2\text{B}_9\text{H}_{11}]$  (**11**) in acetone- $d_6$ .

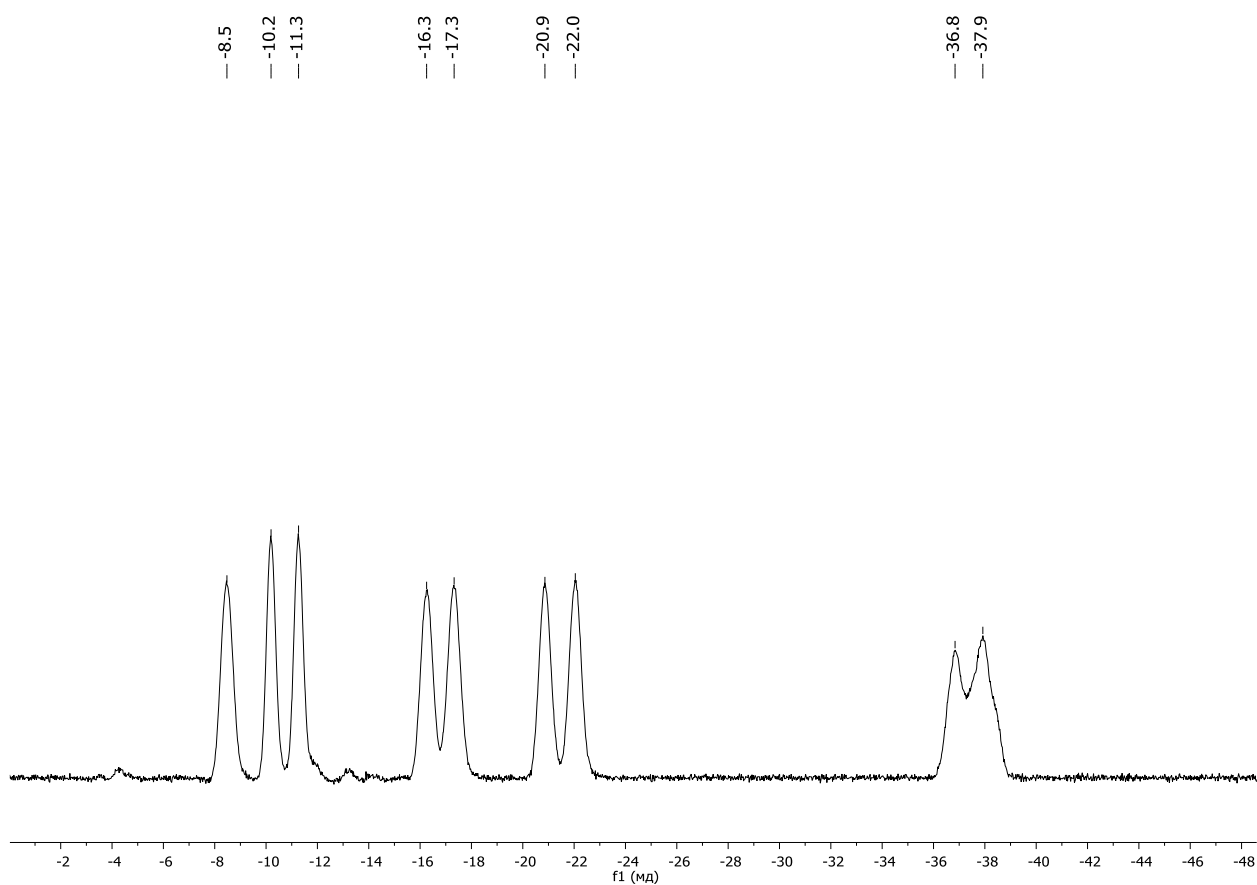

**Figure S44.**  $^{11}\text{B}$  NMR spectrum of  $[3\text{-Cl-7,8-C}_2\text{B}_9\text{H}_{11}]$  (**11**) in acetone- $d_6$ .

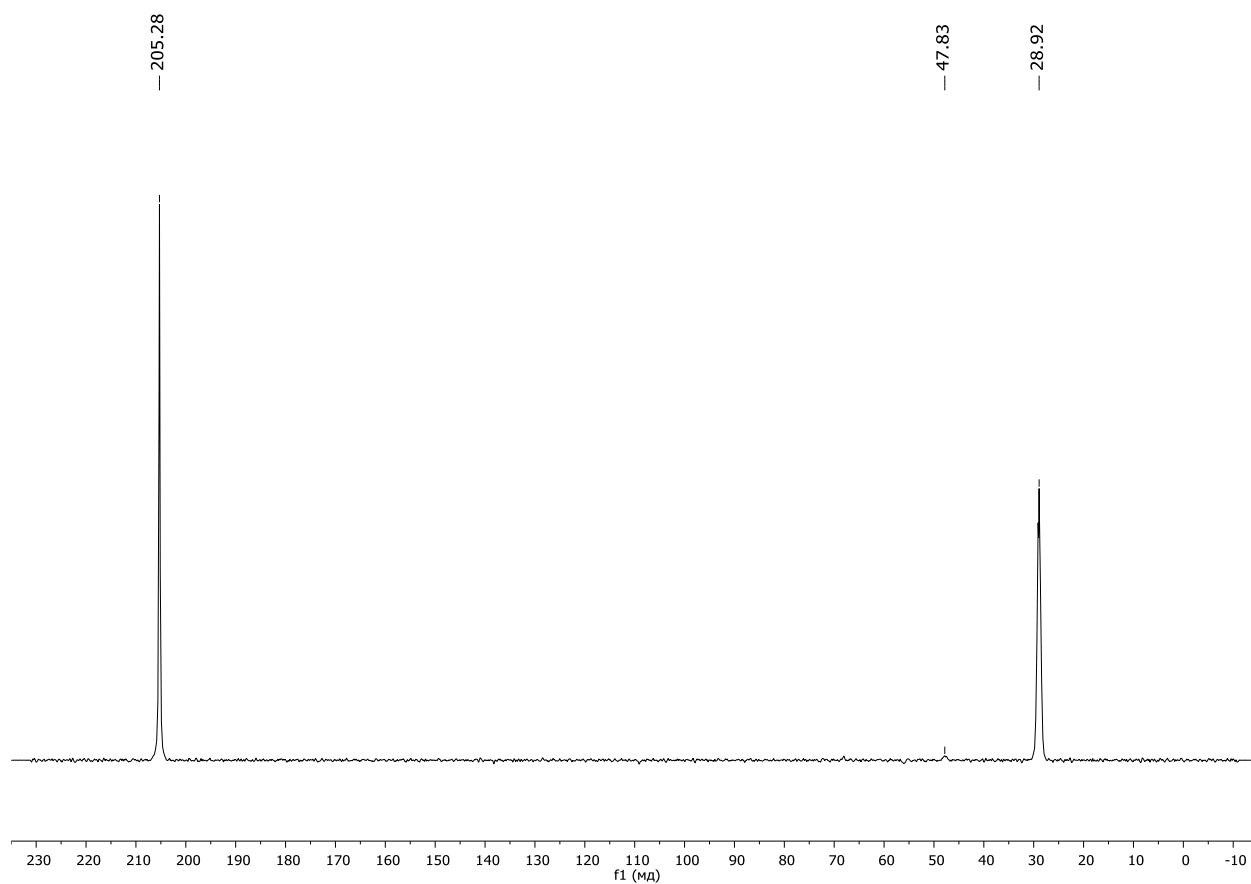

**Figure S45.**  $^{13}\text{C}$  NMR spectrum of  $\text{Cs}[3\text{-Cl-7,8-C}_2\text{B}_9\text{H}_{11}]$  (**11**) in  $\text{acetone-}d_6$ .

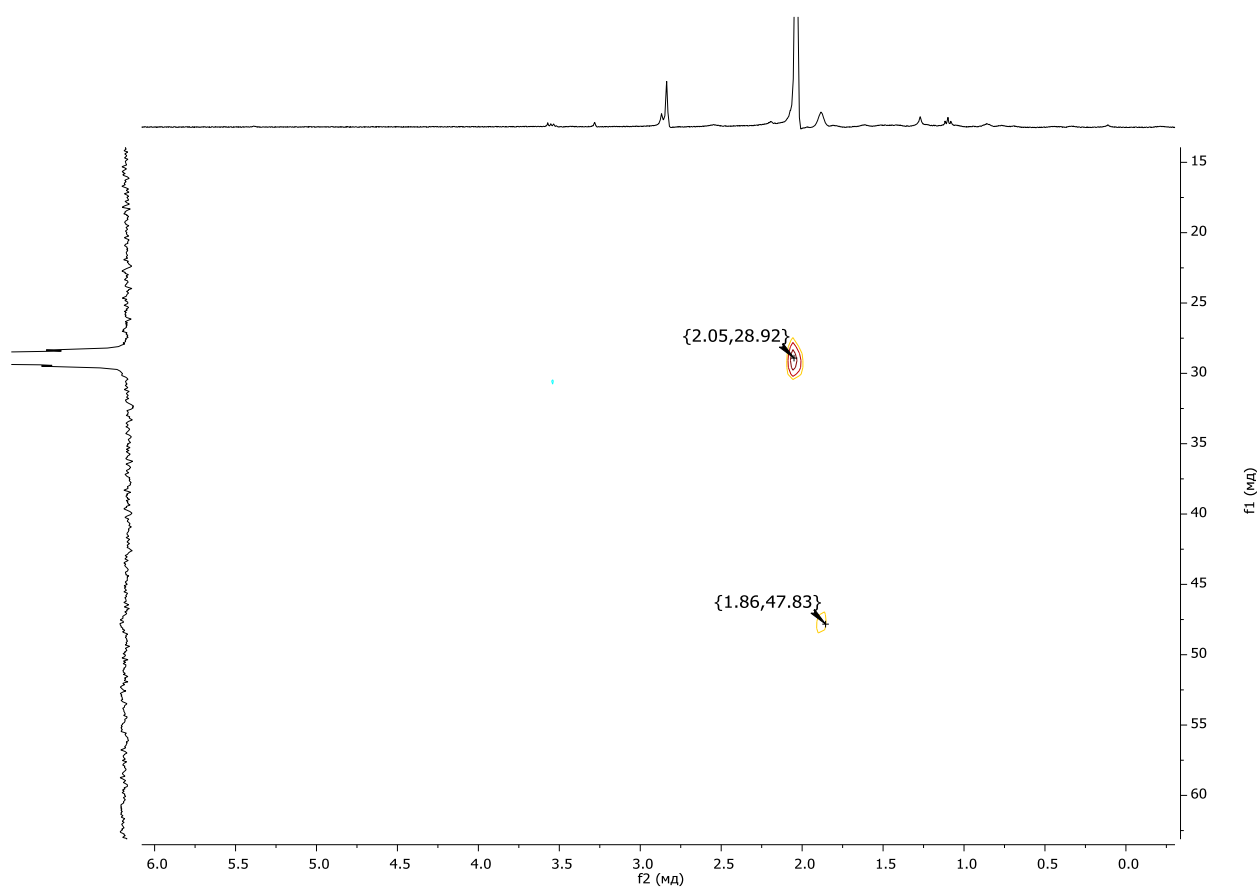

**Figure S46.**  $^1\text{H}$ - $^{13}\text{C}$  HMQC NMR spectrum of  $\text{Cs}[3\text{-Cl-7,8-C}_2\text{B}_9\text{H}_{11}]$  (**11**) in  $\text{acetone-}d_6$ .



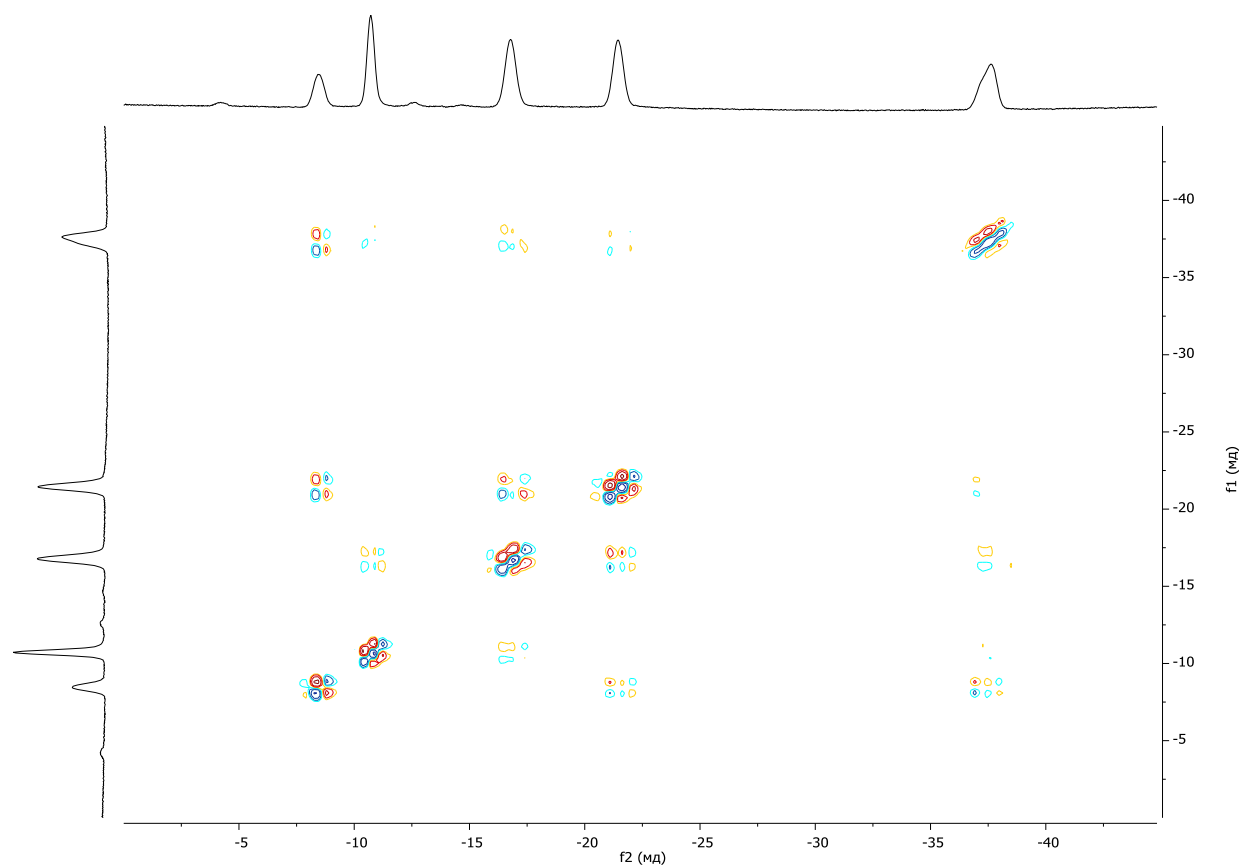

**Figure S48.**  $^{11}\text{B}$ - $^{11}\text{B}$  gDQCOSY NMR spectrum of  $\text{Cs}[3\text{-Cl-7,8-C}_2\text{B}_9\text{H}_{11}]$  (**11**) in acetone- $d_6$ .

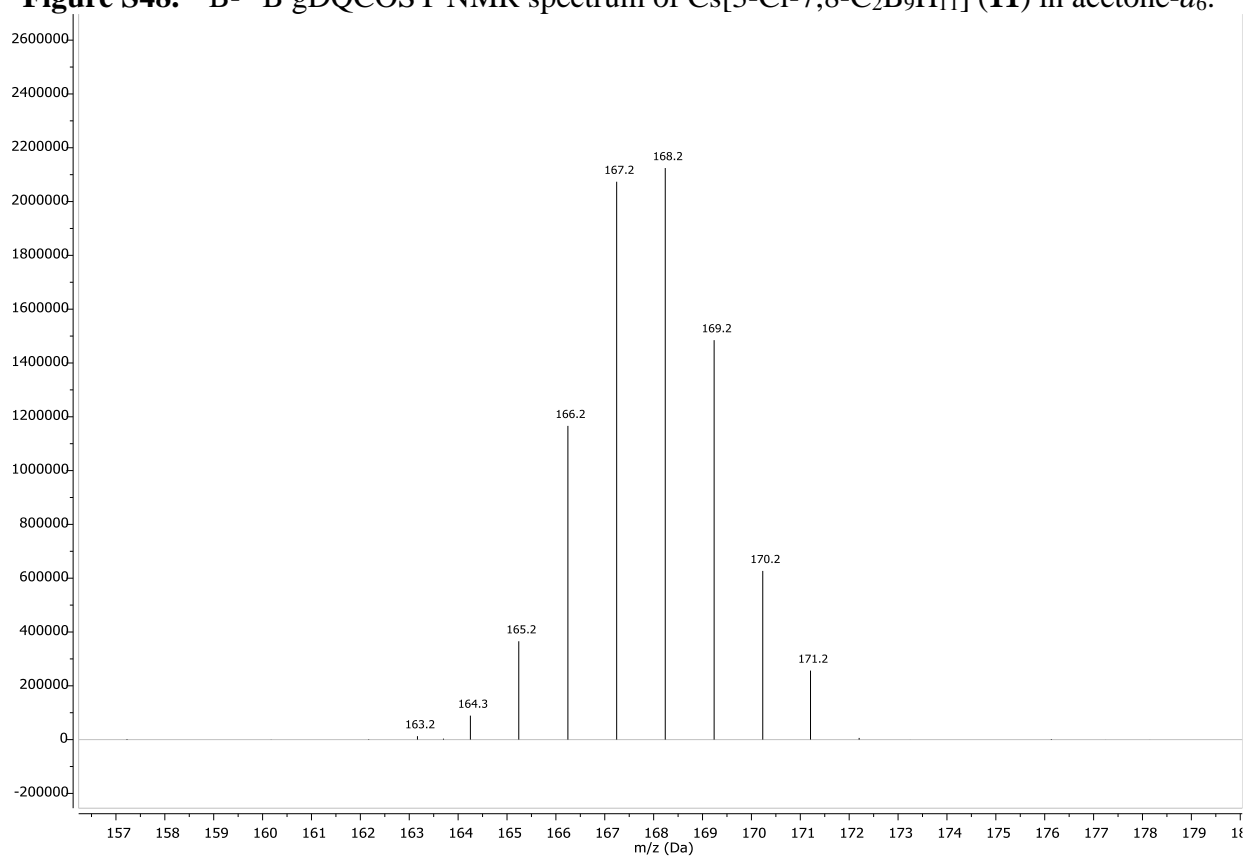

**Figure S48.** Mass-spectrum (DUIS) of  $\text{Cs}[3\text{-Cl-7,8-C}_2\text{B}_9\text{H}_{11}]$  (**11**).
